# Supplementary material for: Robust historical evapotranspiration trends across climate regimes
Source: Copernicus journal article supplement (doi:10.5194/hess-2020-595), 2020-12-09
Supplement: Supplementary file [file hess-2020-595-AC2-supplement.pdf]

# Supplementary Material of:

## Robust historical evapotranspiration trends across climate regimes

Sanaa Hobeichi<sup>1,2</sup>, Gab Abramowitz<sup>1,2</sup>, and Jason Evans<sup>1,2</sup>

<sup>1</sup> Climate Change Research Centre, UNSW Sydney, NSW 2052, Australia.

<sup>2</sup>ARC Centre of Excellence for Climate Extremes, UNSW Sydney, NSW 2052, Australia.

Correspondence to: Sanaa Hobeichi (s.hobeichi@unsw.edu.au)

### S1. Flux tower data

Table S1: Observational data used to constrained the weighting and/or validate DOLCE V2. Site data was accessed during July – November, 2019. Data source includes Ameriflux (ameriflux.lbl.gov), the Atmospheric Radiation Measurement (ARM; arm.gov), AsiaFlux (asiaflux.net), European Fluxes Database (europe-fluxdata.eu), Fluxnet 2015, LaThuile Free Fair Use (fluxnet.fluxdata.org), Oak Ridge data repository (daac.ornl.gov), OzFlux (ozflux.org.au) and individual site principal investigators (PI).

| Site ID | Country   | Longitude | Latitude | Data source  | Reference               |
|---------|-----------|-----------|----------|--------------|-------------------------|
| AR-SLu  | Argentina | -66.4598  | -33.4648 | Fluxnet 2015 | (Cleverly et al., 2013) |
| AT-Neu  | Austria   | 11.3175   | 47.11667 | Fluxnet 2015 | (Cleverly et al., 2013) |
| AU-Ade  | Australia | 131.1178  | -13.0769 | Fluxnet 2015 | (Beringer, 2013a)       |
| AU-ASM  | Australia | 133.249   | -22.283  | Fluxnet 2015 | (Cleverly et al., 2013) |
| AU-Cum  | Australia | 150.7225  | -33.6133 | Fluxnet 2015 | (Pendall, 2015)         |
| AU-CPr  | Australia | 140.5891  | -34.0021 | OzFlux       | (Calperum Tech, 2013)   |
| AU-CTr  | Australia | 145.4469  | -16.1032 | OzFlux       | (Liddell, 2013a )       |
| AU-DaS  | Australia | 131.388   | -14.1593 | Fluxnet 2015 | (Isaac, 2010)           |
| AU-Dry  | Australia | 132.3706  | -15.2588 | Fluxnet 2015 | (Beringer, 2013b)       |
| AU-Emr  | Australia | 148.4746  | -23.8587 | Fluxnet 2015 | (Schroder, 2014)        |
| AU-Fog  | Australia | 131.3072  | -12.5452 | Fluxnet 2015 | (Beringer, 2013c)       |
| AU-How  | Australia | 131.1523  | -12.4943 | OzFlux       | (Andrykanus, 2012)      |
| AU-Gin  | Australia | 115.65    | -31.375  | Fluxnet 2015 | (Silberstein, 2015)     |
| AU-GWW  | Australia | 120.6542  | -30.1914 | OzFlux       | (Macfarlane, 2013)      |
| AU-Lox  | Australia | 140.6551  | -34.4704 | Fluxnet 2015 | (Ewenz, 2015)           |

|        |             |          |          |              |                           |
|--------|-------------|----------|----------|--------------|---------------------------|
| AU-RDF | Australia   | 132.4776 | -14.5636 | Fluxnet 2015 | (Beringer, 2014a)         |
| AU-Rig | Australia   | 145.576  | -36.656  | Fluxnet 2015 | (Beringer, 2014a)         |
| AU-Rob | Australia   | 145.6302 | -17.1174 | Fluxnet 2015 | (Liddell, 2013b)          |
| AU-Stp | Australia   | 133.3503 | -17.1508 | Fluxnet 2015 | (Beringer, 2013d)         |
| AU-TTE | Australia   | 133.64   | -22.287  | Fluxnet 2015 | (Cleverly, 2013)          |
| AU-Tum | Australia   | 148.1516 | -35.6566 | Fluxnet 2015 | (Woodgate, 2013)          |
|        |             |          |          |              |                           |
| AU-Ync | Australia   | 146.2907 | -34.9893 | OzFlux       | (Beringer, 2013e)         |
| AU-Wac | Australia   | 145.1873 | -37.429  | Fluxnet 2015 | (Beringer, 2013f)         |
| AU-Whr | Australia   | 145.0294 | -36.6732 | OzFlux       | (Beringer, 2017 )         |
| AU-Wom | Australia   | 144.0944 | -37.4222 | Fluxnet 2015 | (Stefan, 2013)            |
| BE-Bra | Belgium     | 4.52056  | 51.30917 | Fluxnet 2015 | (Stoy et al., 2013)       |
| BE-Lon | Belgium     | 4.74613  | 50.55159 | Fluxnet 2015 | (McCaughey et al., 2006)  |
| BE-Vie | Belgium     | 5.99805  | 50.30507 | Fluxnet 2015 | (Stoy et al., 2013)       |
| BNS    | China       | 101.2653 | 21.9275  | AsiaFlux     | asiaflux.net              |
| BR-Ban | Brazil      | -50.1591 | -9.82442 | Oak Ridge    | (Saleska et al., 2013)    |
| BR-Ji1 | Brazil      | -62.3572 | -10.7618 | Oak Ridge    | (Saleska et al., 2013)    |
| BR-Ji3 | Brazil      | -61.9331 | -10.078  | Oak Ridge    | (Saleska et al., 2013)    |
| BR-Ma2 | Brazil      | -60.2091 | -2.609   | Oak Ridge    | (Saleska et al., 2013)    |
| BR-Sa1 | Brazil      | -54.959  | -2.857   | Oak Ridge    | (Saleska et al., 2013)    |
| BR-Sa3 | Brazil      | -54.9714 | -3.01803 | LaThuile     | (Stoy et al., 2013)       |
| BW-Ma1 | Botswana    | 23.56033 | -19.9165 | LaThuile     | (Stoy et al., 2013)       |
| CA-ARF | Canada      | -83.955  | 52.7008  | AmeriFlux    | (Euskirchen et al., 2017) |
| CA-Ca2 | Canada      | -125.291 | 49.8705  | AmeriFlux    | (Chen et al., 2006)       |
| CA-Cbo | Canada      | -79.9333 | 44.3167  | AmeriFlux    | (Barr et al., 2002)       |
| CA-Ca3 | Canada      | -124.9   | 49.5346  | AmeriFlux    | (Chen et al., 2006)       |
| CA-Let | Canada      | -112.94  | 49.7093  | AmeriFlux    | (Conte et al., 2003)      |
| CA-Man | Canada      | -98.4808 | 55.8796  | LaThuile     | fluxnet.ornl.gov          |
| CA-Mer | Canada      | -75.5186 | 45.4094  | LaThuile     | (Lafleur, et al., 2003)   |
| CA-NS2 | Canada      | -98.5247 | 55.9058  | LaThuile     | fluxnet.ornl.gov          |
| CA-NS6 | Canada      | -98.9644 | 55.9167  | LaThuile     | fluxnet.ornl.gov          |
| CA-NS7 | Canada      | -99.9483 | 56.6358  | LaThuile     | fluxnet.ornl.gov          |
| CA-Ojp | Canada      | -104.692 | 53.9163  | AmeriFlux    | (Baldocchi et al., 2000)  |
| CA-Qcu | Canada      | -74.0365 | 49.2671  | LaThuile     | (Chu et al., 2018)        |
| CA-Qfo | Canada      | -74.3421 | 49.6925  | Fluxnet 2015 | fluxnet.ornl.gov          |
| CA-SCC | Canada      | -121.299 | 61.3079  | AmeriFlux    | (Euskirchen et al., 2017) |
| CA-SF1 | Canada      | -105.818 | 54.485   | Fluxnet 2015 | fluxnet.ornl.gov          |
| CA-SF3 | Canada      | -106.005 | 54.0916  | Fluxnet 2015 | fluxnet.ornl.gov          |
| CA-TP1 | Canada      | -80.5595 | 42.6609  | AmeriFlux    | (Arain et al., 2005)      |
| CA-TP4 | Canada      | -80.3574 | 42.7102  | AmeriFlux    | (Arain et al., 2005)      |
| CH-Cha | Switzerland | 8.41044  | 47.21022 | Fluxnet 2015 | fluxnet.ornl.gov          |
| CH-Dav | Switzerland | 9.85592  | 46.81533 | Fluxnet 2015 | fluxnet.ornl.gov          |

|        |                |          |          |                    |                                 |
|--------|----------------|----------|----------|--------------------|---------------------------------|
| CH-Fru | Switzerland    | 8.53778  | 47.11583 | Fluxnet 2015       | fluxnet.ornl.gov                |
| CH-Oe1 | Switzerland    | 7.73194  | 47.28583 | LaThuile           | fluxnet.ornl.gov                |
| CN-Cng | China          | 123.5092 | 44.5934  | Fluxnet 2015       | fluxnet.ornl.gov                |
| CN-Du2 | China          | 116.2836 | 42.0467  | Fluxnet 2015       | (Stoy et al., 2013)             |
| CN-HaM | China          | 101.18   | 37.37    | Fluxnet 2015       | (Li et al., 2013)               |
| CN-QHB | China          | 101.332  | 37.60743 | AsiaFlux           | asiaflux.net                    |
| CN-QYZ | China          | 115.0663 | 26.73396 | AsiaFlux           | asiaflux.net                    |
| CZ-BK1 | Czech Republic | 18.53688 | 49.50208 | European Fluxes DB | europe-fluxdata.eu              |
| CZ-BK2 | Czech Republic | 18.54285 | 49.49443 | European Fluxes DB | europe-fluxdata.eu              |
| CZ-RAJ | Czech Republic | 16.69651 | 49.44372 | European Fluxes DB | europe-fluxdata.eu              |
| CZ-Stn | Czech Republic | 17.9699  | 49.03598 | European Fluxes DB | europe-fluxdata.eu              |
| CZ-wet | Czech Republic | 14.77035 | 49.02465 | Fluxnet 2015       | (Stoy et al., 2013)             |
| DE-Geb | Germany        | 10.9143  | 51.1001  | Fluxnet 2015       | (Revill et al., 2013)           |
| DE-Hai | Germany        | 10.453   | 51.07917 | Fluxnet 2015       | (Ershadi et al., 2014)          |
| DE-Hte | Germany        | 12.17611 | 54.21028 | European Fluxes DB | europe-fluxdata.eu              |
| DE-Hzd | Germany        | 13.48982 | 50.96403 | European Fluxes DB | europe-fluxdata.eu              |
| DE-Kli | Germany        | 13.52251 | 50.89288 | Fluxnet 2015       | (Revill et al., 2013)           |
| DE-Lkb | Czech Republic | 13.30467 | 49.09962 | Fluxnet 2015       | fluxnet.ornl.gov                |
| DE-Meh | Germany        | 10.65547 | 51.27531 | LaThuile           | fluxnet.ornl.gov                |
| DE-RuR | Germany        | 6.30413  | 50.62191 | Fluxnet 2015       | fluxnet.ornl.gov                |
| DE-Seh | Germany        | 6.44965  | 50.87062 | Fluxnet 2015       | fluxnet.ornl.gov                |
| DE-SfN | Germany        | 11.3275  | 47.80639 | Fluxnet 2015       | fluxnet.ornl.gov                |
| DE-Wet | Germany        | 11.45753 | 50.4535  | LaThuile           | (Stoy et al., 2013)             |
| DE-Zrk | Germany        | 12.88901 | 53.87594 | Fluxnet 2015       | fluxnet.ornl.gov                |
| DK-Fou | Denmark        | 9.58722  | 56.4842  | LaThuile           | (Stoy et al., 2013)             |
| DK-Ris | Denmark        | 12.09722 | 55.53028 | LaThuile           | (Gilmanov et al., 2010)         |
| DK-Sor | Denmark        | 11.64464 | 55.48587 | Fluxnet 2015       | (Stoy et al., 2013)             |
| DK-ZaF | Greenland      | -20.5557 | 74.4791  | Fluxnet 2015       | (Soegaard and Nordstroem, 1999) |
| ES-ES1 | Spain          | -0.31881 | 39.34597 | LaThuile           | (Stoy et al., 2013)             |
| ES-LgS | Spain          | -2.96583 | 37.09794 | Fluxnet 2015       | fluxnet.ornl.gov                |
| ES-LJu | Spain          | -2.75212 | 36.92659 | Fluxnet 2015       | fluxnet.ornl.gov                |
| ES-LMa | Spain          | -5.77336 | 39.9415  | LaThuile           | (Stoy et al., 2013)             |
| ES-VDA | Spain          | 1.4485   | 42.15218 | LaThuile           | (Stoy et al., 2013)             |
| FI-Hyy | Finland        | 24.295   | 61.8475  | Fluxnet 2015       | (Stoy et al., 2013)             |
| FI-Jok | Finland        | 23.51345 | 60.8986  | Fluxnet 2015       | (Reichstein et al., 2005)       |
| FI-Kaa | Finland        | 27.29503 | 69.14069 | LaThuile           | (Aurela et al., 2001)           |
| FI-Kns | Finland        | 24.35617 | 60.64683 | European Fluxes DB | europe-fluxdata.eu              |
| FI-Lom | Finland        | 24.20918 | 67.9972  | Fluxnet 2015       | fluxnet.ornl.gov                |

|        |          |          |          |                    |                            |
|--------|----------|----------|----------|--------------------|----------------------------|
| FI-Sod | Finland  | 26.63783 | 67.36186 | Fluxnet 2015       | (Stoy et al., 2013)        |
| FI-Var | Finland  | 29.61    | 67.7549  | European Fluxes DB | europe-fluxdata.eu         |
| FR-Fon | France   | 2.78014  | 48.4764  | LaThuile           | (Stoy et al., 2013)        |
| FR-Gri | France   | 1.95191  | 48.84422 | Fluxnet 2015       | (Loubet et al., 2011)      |
| FR-Hes | France   | 7.06556  | 48.67416 | LaThuile           | (Reichstein et al., 2005)  |
| FR-LBr | France   | -0.7693  | 44.71711 | Fluxnet 2015       | fluxnet.ornl.gov           |
| FR-Lq1 | France   | 2.73583  | 45.64306 | LaThuile           | (Gilmanov et al., 2007)    |
| FR-Lq2 | France   | 2.73703  | 45.63919 | LaThuile           | (Gilmanov et al., 2007)    |
| FR-Lus | France   | 0.12065  | 46.41425 | European Fluxes DB | europe-fluxdata.eu         |
| FR-Pue | France   | 3.59583  | 43.74139 | Fluxnet 2015       | (Wei et al., 2014)         |
| GRW    | Portugal | -28.0297 | 39.0911  | ARM                | (ARM, 2009)                |
| HFE    | China    | 116.782  | 32.5584  | ARM                | (ARM, 2008)                |
| HFK    | S.Korea  | 127.57   | 34.55389 | AsiaFlux           | asiaflux.net               |
| HU-He1 | Hungary  | 16.65222 | 46.95583 | PI                 | (Barcza et al., 2009)      |
| HU-Bug | Hungary  | 19.6013  | 46.6911  | LaThuile           | (Stoy et al., 2013)        |
| HU-Mat | Hungary  | 19.726   | 47.8469  | LaThuile           | (Stoy et al., 2013)        |
| ID-Pag | Malaysia | 114.036  | 2.345    | LaThuile           | (Hirano et al., 2007)      |
| IE-Ca1 | Ireland  | -6.91814 | 52.85879 | LaThuile           | (Stoy et al., 2013)        |
| IE-Dri | Ireland  | -8.75181 | 51.98669 | LaThuile           | (Stoy et al., 2013)        |
| IL-Yat | Israel   | 35.0515  | 31.345   | LaThuile           | (Reichstein et al., 2003)  |
| IS-Gun | Iceland  | -20.2167 | 63.8333  | LaThuile           | fluxnet.ornl.gov           |
| IT-BCi | Italy    | 14.95744 | 40.52375 | Fluxnet 2015       | fluxnet.ornl.gov           |
| IT-CA3 | Italy    | 12.0222  | 42.38    | Fluxnet 2015       | fluxnet.ornl.gov           |
| IT-Cas | Italy    | 8.71752  | 45.07005 | LaThuile           | fluxnet.ornl.gov           |
| IT-Col | Italy    | 13.58814 | 41.84936 | Fluxnet 2015       | (Stoy et al., 2013)        |
| IT-Cpz | Italy    | 12.37611 | 41.70525 | Fluxnet 2015       | (Wei et al., 2014)         |
| IT-Isp | Italy    | 8.63358  | 45.81264 | Fluxnet 2015       | fluxnet.ornl.gov           |
| IT-Lav | Italy    | 11.28132 | 45.9562  | Fluxnet 2015       | (Cescatti and Zorer, 2003) |
| IT-Lec | Italy    | 11.26975 | 43.30359 | LaThuile           | (Stoy et al., 2013)        |
| IT-LMa | Italy    | 7.58259  | 45.15258 | LaThuile           | fluxnet.ornl.gov           |
| IT-Mal | Italy    | 11.70334 | 46.11402 | LaThuile           | (Gilmanov et al., 2007)    |
| IT-MBo | Italy    | 11.04583 | 46.01468 | Fluxnet 2015       | (Gilmanov et al., 2007)    |
| IT-Noe | Italy    | 8.15146  | 40.60613 | Fluxnet 2015       | fluxnet.ornl.gov           |
| IT-Non | Italy    | 11.09109 | 44.69019 | LaThuile           | fluxnet.ornl.gov           |
| IT-PT1 | Italy    | 9.06104  | 45.20087 | Fluxnet 2015       | (Stoy et al., 2013)        |
| IT-Ren | Italy    | 11.43369 | 46.58686 | Fluxnet 2015       | (Stoy et al., 2013)        |
| IT-Ro3 | Italy    | 11.91542 | 42.37539 | European Fluxes DB | europe-fluxdata.eu         |
| IT-SRo | Italy    | 10.28444 | 43.72786 | Fluxnet 2015       | fluxnet.ornl.gov           |
| IT-Tor | Italy    | 7.57806  | 45.84444 | Fluxnet 2015       | (Galvagno et al., 2013)    |
| JP-TKY | Japan    | 137.4231 | 36.14617 | AsiaFlux           | (Hirata et al., 2008)      |
| MAO    | Brazil   | -60.5981 | -3.21297 | ARM                | (ARM, 2014)                |

|        |             |          |          |                    |                                   |
|--------|-------------|----------|----------|--------------------|-----------------------------------|
| MMF    | Japan       | 142.2613 | 44.3219  | AsiaFlux           | asiaflux.net                      |
| MN-SKT | Mongolia    | 108.6543 | 48.35186 | AsiaFlux           | (Hirata et al., 2008)             |
| MSE    | Japan       | 140.0269 | 36.054   | AsiaFlux           | asiaflux.net                      |
| MX-Lpa | Mexico      | -110.438 | 24.1293  | AmeriFlux          | (Bell et al., 2012)               |
| NIM    | Niger       | 2.1758   | 13.4773  | ARM                | (ARM, 2005)                       |
| NL-Ca1 | Netherlands | 4.927    | 51.971   | LaThuile           | fluxnet.ornl.gov                  |
| NL-Haa | Netherlands | 4.80556  | 52.00361 | LaThuile           | fluxnet.ornl.gov                  |
| NL-Hor | Netherlands | 5.0713   | 52.24035 | Fluxnet 2015       | (Sulkava et al., 2011)            |
| NL-Loo | Netherlands | 5.74356  | 52.16658 | Fluxnet 2015       | (Gash and Dolman, 2003)           |
| NL-Mol | Netherlands | 4.63908  | 51.65    | LaThuile           | (Gilmanov et al., 2007)           |
| NO-Adv | Norway      | 15.923   | 78.186   | Fluxnet 2015       | fluxnet.ornl.gov                  |
| NSA    | USA         | -156.608 | 71.325   | ARM                | (ARM, 2011)                       |
| NZ-BFu | New Zealand | 171.9268 | -43.5918 | OzFlux             | (Laubach, 2016)                   |
| PL-wet | Poland      | 16.3094  | 52.7622  | LaThuile           | (stoy et al., 2013)               |
| PT-Esp | Portugal    | -8.6018  | 38.6394  | LaThuile           | (stoy et al., 2013)               |
| PT-Mi1 | Portugal    | -8.00006 | 38.54064 | LaThuile           | (stoy et al., 2013)               |
| PT-Mi2 | Portugal    | -8.02455 | 38.4765  | LaThuile           | (stoy et al., 2013)               |
| RU-Cok | Russia      | 147.4943 | 70.82914 | Fluxnet 2015       | (Stoy et al., 2013)               |
| RU-Fyo | Russia      | 32.92208 | 56.46153 | Fluxnet 2015       | (Stoy et al., 2013)               |
| RU-Ha1 | Russia      | 90.00215 | 54.72517 | Fluxnet 2015       | (Belelli Marchesini et al., 2007) |
| RU-Ha2 | Russia      | 89.95664 | 54.77301 | LaThuile           | (Belelli Marchesini et al., 2007) |
| RU-Ha3 | Russia      | 89.07785 | 54.70455 | LaThuile           | (Belelli Marchesini et al., 2007) |
| RU-Zot | Russia      | 89.3508  | 60.8008  | LaThuile           | (Eugster et al., 2000)            |
| SD-Dem | Sudan       | 30.4783  | 13.2829  | Fluxnet 2015       | fluxnet.ornl.gov                  |
| SE-Deg | Sweden      | 19.55669 | 64.18197 | LaThuile           | fluxnet.ornl.gov                  |
| SE-Faj | Sweden      | 13.55351 | 56.26547 | LaThuile           | (Stoy et al., 2013)               |
| SE-Fla | Sweden      | 19.45694 | 64.11278 | LaThuile           | (Stoy et al., 2013)               |
| SE-Nor | Sweden      | 17.4795  | 60.0865  | LaThuile           | (Stoy et al., 2013)               |
| SE-Sk2 | Sweden      | 17.84006 | 60.12967 | LaThuile           | (Stoy et al., 2013)               |
| SE-Svb | Sweden      | 19.7745  | 64.25611 | European Fluxes DB | europe-fluxdata.eu                |
| SGP    | USA         | -96.855  | 37.521   | ARM                | (ARM, 1997)                       |
| SN-Dhr | Senegal     | -15.4322 | 15.40278 | Fluxnet 2015       | fluxnet.ornl.gov                  |
| TWP    | Australia   | 130.881  | -12.486  | ARM                | (ARM, 2013)                       |
| UK-EBu | UK          | -3.20578 | 55.866   | LaThuile           | (Stoy et al., 2013)               |
| UK-ESa | UK          | -2.85861 | 55.90694 | LaThuile           | (Stoy et al., 2013)               |
| UK-Gri | UK          | -3.79806 | 56.60722 | LaThuile           | (Stoy et al., 2013)               |
| UK-Ham | UK          | -0.8583  | 51.15353 | LaThuile           | (Stoy et al., 2013)               |
| UK-LBT | UK          | -0.1389  | 51.5215  | European Fluxes DB | europe-fluxdata.eu                |
| UK-PL3 | UK          | -1.26667 | 51.45    | LaThuile           | fluxnet.ornl.gov                  |
| UK-Tad | UK          | -2.82864 | 51.2071  | LaThuile           | fluxnet.ornl.gov                  |
| US-ADR | USA         | -116.693 | 36.7653  | AmeriFlux          | (Euskirchen et al., 2017)         |
| US-AR1 | USA         | -99.42   | 36.4267  | Fluxnet 2015       | fluxnet.ornl.gov                  |

|        |     |          |          |              |                                  |
|--------|-----|----------|----------|--------------|----------------------------------|
| US-AR2 | USA | -99.5975 | 36.6358  | Fluxnet 2015 | fluxnet.ornl.gov                 |
| US-ARc | USA | -98.0401 | 35.54649 | Fluxnet 2015 | (Stoy et al., 2013)              |
| US-ARM | USA | -97.4888 | 36.6058  | Fluxnet 2015 | (Bagley et al., 2017)            |
| US-Aud | USA | -110.51  | 31.5907  | AmeriFlux    | (Baldocchi et al., 2015)         |
| US-Bar | USA | -71.2881 | 44.0646  | LaThuile     | fluxnet.ornl.gov                 |
| US-Bkg | USA | -96.8362 | 44.3453  | AmeriFlux    | (Euskirchen et al., 2017)        |
| US-Blk | USA | -103.65  | 44.158   | AmeriFlux    | (Euskirchen et al., 2017)        |
| US-Blo | USA | -120.633 | 38.8952  | Fluxnet 2015 | (Reichstein et al., 2003)        |
| US-Bo1 | USA | -88.2904 | 40.0062  | LaThuile     | (Stoy et al., 2013)              |
| US-Br3 | USA | -93.6936 | 41.9747  | AmeriFlux    | (Chu et al., 2018)               |
| US-Cop | USA | -109.39  | 38.09    | Fluxnet 2015 | fluxnet.ornl.gov                 |
| US-CPk | USA | -106.119 | 41.068   | AmeriFlux    | (Chu et al., 2018)               |
| US-Ctn | USA | -101.847 | 43.95    | AmeriFlux    | (Euskirchen et al., 2017)        |
| US-CZ2 | USA | -119.257 | 37.0311  | AmeriFlux    | (Euskirchen et al., 2017)        |
| US-Dix | USA | -74.4346 | 39.9712  | AmeriFlux    | (Chu et al., 2018)               |
| US-EML | USA | -149.254 | 63.8784  | AmeriFlux    | (Belshe et al., 2012)            |
| US-FPe | USA | -105.102 | 48.3077  | LaThuile     | (Ershadi et al., 2014)           |
| US-FR3 | USA | -97.99   | 29.94    | AmeriFlux    | (Euskirchen et al., 2017)        |
| US-Fuf | USA | -111.762 | 35.089   | AmeriFlux    | (Amiro et al., 2010)             |
| US-GLE | USA | -106.239 | 41.3644  | Fluxnet 2015 | fluxnet.ornl.gov                 |
| US-GMF | USA | -73.2333 | 41.9667  | AmeriFlux    | (Chu et al., 2018)               |
| US-Goo | USA | -89.8735 | 34.2547  | Fluxnet 2015 | fluxnet.ornl.gov                 |
| US-Ha1 | USA | -72.1715 | 42.5378  | LaThuile     | (Barford et al., 2001)           |
| US-Ho2 | USA | -68.747  | 45.2091  | LaThuile     | (Wei et al., 2014)               |
| US-IB2 | USA | -88.241  | 41.8406  | AmeriFlux    | (Allison et al., 2005)           |
| US-Ivo | USA | -155.75  | 68.4865  | AmeriFlux    | (Euskirchen et al., 2017)        |
| US-Kon | USA | -96.5603 | 39.0824  | AmeriFlux    | (Antunes et al., 2001)           |
| US-KS2 | USA | -80.6715 | 28.60858 | Fluxnet 2015 | fluxnet.ornl.gov                 |
| US-KUT | USA | -93.1863 | 44.995   | AmeriFlux    | (Euskirchen et al., 2017)        |
| US-Los | USA | -89.9792 | 46.0827  | Fluxnet 2015 | (Baker et al., 2003)             |
| US-Me1 | USA | -121.5   | 44.5794  | Fluxnet 2015 | (Irvine & Hibbard, 2007)         |
| US-Me2 | USA | -121.557 | 44.4523  | Fluxnet 2015 | (Irvine & Hibbard, 2007)         |
| US-MMS | USA | -86.4131 | 39.3231  | Fluxnet 2015 | (Baldocchi et al., 2001)         |
| US-MOz | USA | -92.2    | 38.7441  | LaThuile     | (Stoy et al., 2013)              |
| US-Mpj | USA | -106.238 | 34.4384  | AmeriFlux    | (Anderson-Teixeira et al., 2011) |
| US-MRf | USA | -123.552 | 44.6465  | AmeriFlux    | (Chu et al., 2018)               |
| US-Myb | USA | -121.765 | 38.0498  | AmeriFlux    | (Baldocchi et al., 2018)         |
| US-Ne1 | USA | -96.4766 | 41.1651  | Fluxnet 2015 | fluxnet.ornl.gov                 |
| US-NR1 | USA | -105.546 | 40.0329  | Fluxnet 2015 | (Albert et al., 2017)            |
| US-Oho | USA | -83.8438 | 41.5545  | Fluxnet 2015 | (Stoy et al., 2013)              |
| US-PFa | USA | -90.2723 | 45.9459  | LaThuile     | (Keppel et al., 2012)            |
| US-Pon | USA | -97.1333 | 36.7667  | AmeriFlux    | (Euskirchen et al., 2017)        |
| US-Prr | USA | -147.488 | 65.1237  | Fluxnet 2015 | (Ikawa et al., 2015)             |

|        |              |          |          |              |                                  |
|--------|--------------|----------|----------|--------------|----------------------------------|
| US-RC1 | USA          | -117.078 | 46.7837  | AmeriFlux    | (Chi et al, 2017a)               |
| US-RC3 | USA          | -118.598 | 46.991   | AmeriFlux    | (Chi et al, 2017a)               |
| US-RC4 | USA          | -116.949 | 46.758   | AmeriFlux    | (Chi et al, 2017a)               |
| US-RC5 | USA          | -119.248 | 47.01    | AmeriFlux    | (Chi et al, 2017b)               |
| US-RIs | USA          | -116.736 | 43.1439  | AmeriFlux    | (Euskirchen et al., 2017)        |
| US-Ro1 | USA          | -93.0898 | 44.7143  | AmeriFlux    | (Baker et al., 2003)             |
| US-SCd | USA          | -116.372 | 33.6518  | AmeriFlux    | (Euskirchen et al., 2017)        |
| US-SCf | USA          | -116.772 | 33.8079  | AmeriFlux    | (Euskirchen et al., 2017)        |
| US-SCs | USA          | -117.696 | 33.7343  | AmeriFlux    | (Euskirchen et al., 2017)        |
| US-Sdh | USA          | -101.407 | 42.0693  | AmeriFlux    | (Billesbach and Arkebauer, 2004) |
| US-Ses | USA          | -106.744 | 34.3349  | AmeriFlux    | (Anderson-Teixeira et al., 2011) |
| US-SFP | USA          | -96.902  | 43.2408  | AmeriFlux    | (Euskirchen et al., 2017)        |
| US-Shd | USA          | -96.6833 | 36.9333  | AmeriFlux    | (Burba et al., 2001)             |
| US-Skr | USA          | -81.0776 | 25.3629  | AmeriFlux    | (Barr et al., 2013)              |
| US-Slt | USA          | -74.596  | 39.9138  | AmeriFlux    | (Chu et al., 2018)               |
| US-SP1 | USA          | -82.2188 | 29.7381  | AmeriFlux    | (Burton et al., 2002)            |
| US-SP2 | USA          | -82.2448 | 29.7648  | LaThuile     | (Castro et al., 2000)            |
| US-SP3 | USA          | -82.1633 | 29.7548  | AmeriFlux    | (Castro et al., 2000)            |
| US-SRM | USA          | -110.866 | 31.8214  | AmeriFlux    | (Barron-Gafford et al., 2013)    |
| US-Srr | USA          | -122.026 | 38.2006  | AmeriFlux    | (Chu et al., 2018)               |
| US-SuW | USA          | -156.491 | 20.8246  | AmeriFlux    | (Anderson et al., 2015)          |
| US-Syv | USA          | -89.3477 | 46.242   | Fluxnet 2015 | (Chu et al., 2018)               |
| US-Twt | USA          | -121.652 | 38.1055  | Fluxnet 2015 | (Baldocchi et al., 2018)         |
| US-UMd | USA          | -84.6975 | 45.5625  | AmeriFlux    | (Chu et al., 2018)               |
| US-Var | USA          | -120.951 | 38.4133  | Fluxnet 2015 | (Baldocchi et al., 2004)         |
| US-WBW | USA          | -84.2874 | 35.9588  | LaThuile     | (Baldocchi et al., 2004)         |
| US-WCr | USA          | -90.0799 | 45.8059  | Fluxnet 2015 | (Baker et al., 2003)             |
| US-Wdn | USA          | -106.262 | 40.7838  | AmeriFlux    | (Euskirchen et al., 2017)        |
| US-Whs | USA          | -110.052 | 31.7438  | AmeriFlux    | (Biederman, et al., 2016)        |
| US-Wi4 | USA          | -91.1663 | 46.7393  | LaThuile     | (Hilton et al., 2014)            |
| US-Wi6 | USA          | -91.2982 | 46.6249  | Fluxnet 2015 | (Noormets et al., 2007)          |
| US-Wjs | USA          | -105.862 | 34.4255  | AmeriFlux    | (Anderson-Teixeira et al., 2011) |
| US-Wkg | USA          | -109.942 | 31.7365  | Fluxnet 2015 | (Biederman, et al., 2016)        |
| US-Wrc | USA          | -121.952 | 45.8205  | AmeriFlux    | (Chu et al., 2018)               |
| RU-YLF | Russia       | 129.2414 | 62.255   | AsiaFlux     | asiaflux.net                     |
| RU-YPF | Russia       | 129.6506 | 62.24139 | AsiaFlux     | asiaflux.net                     |
| ZA-Kru | South Africa | 31.4969  | -25.0197 | LaThuile     | (King et al., 2003)              |
| ZM-Mon | Zambia       | 23.25278 | -15.4378 | Fluxnet 2015 | (King et al., 2003)              |

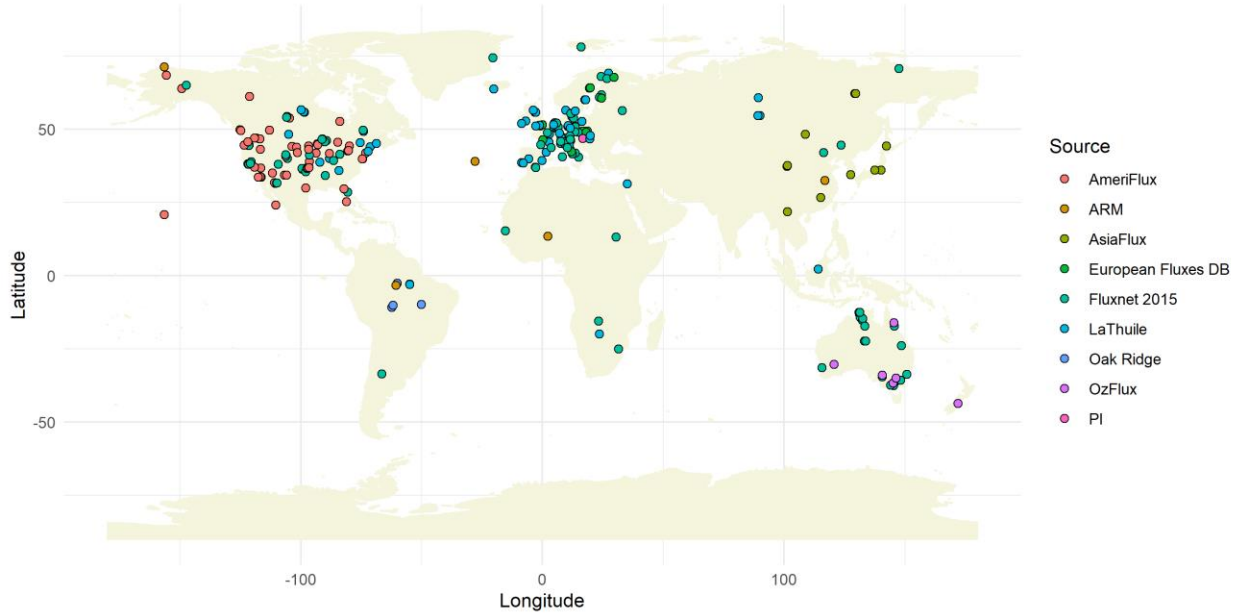

21 Figure S1: Location of the 260 sites used to derive and validate DOLCE V2, color-coded by data source.  
 22 Data source includes Ameriflux (ameriflux.lbl.gov), the Atmospheric Radiation Measurement (ARM;  
 23 arm.gov), AsiaFlux (asiaflux.net), European Fluxes Database (europe-fluxdata.eu), Fluxnet 2015,  
 24 LaThuile Free Fair Use (fluxnet.fluxdata.org), Oak Ridge data repository (daac.ornl.gov), OzFlux (ozflux.org.au) and  
 25 individual site principal investigators (PI).  
 26

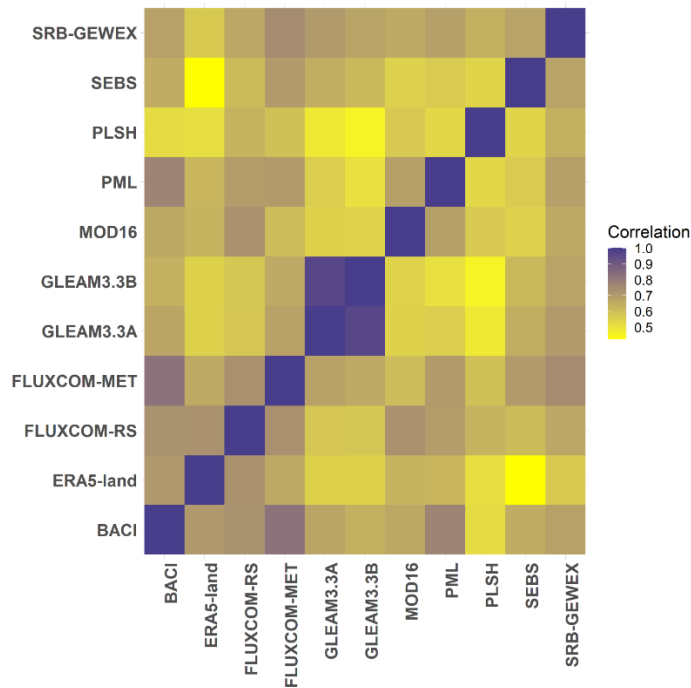

27  
 28 Figure S2: Error correlation between the participating parent datasets of DOLCE V2 when compared to  
 29 in-situ data from 260 sites. Large correlation (>0.5) between two datasets indicates that their errors are  
 30 highly dependent.  
 31  
 32



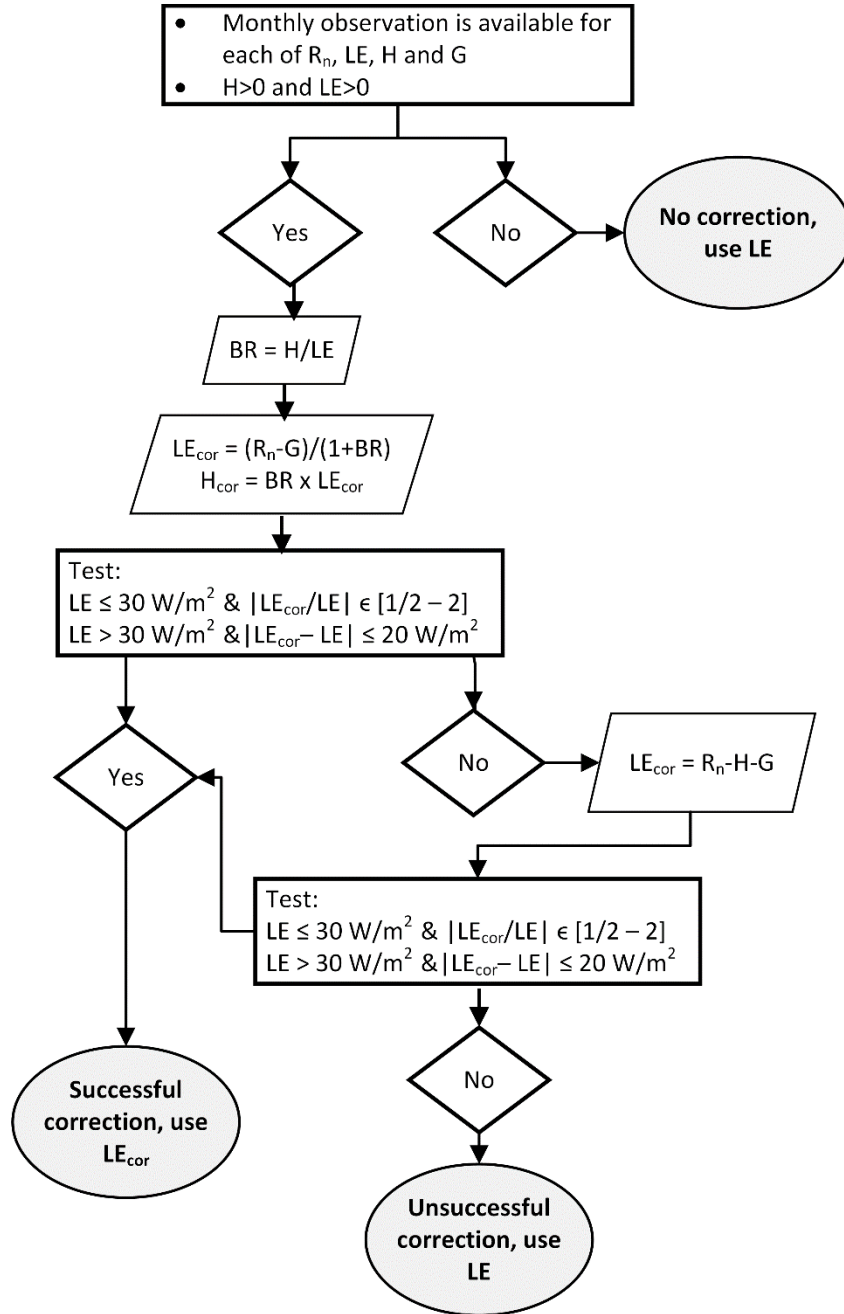

33  
34  
35  
36  
37  
38  
39  
40  
41  
42

Figure S3: Flowchart illustrating the correction steps carried out for every monthly record of observed LE at the flux tower sites to correct for energy balance non-closure.

## S2. Global ET datasets

Table S2: Access information and download data of the global ET datasets (also referred to as parent datasets) used to develop DOLCE V2 and DOLCE V3.

| Dataset | Access to data | Download date |
|---------|----------------|---------------|
|---------|----------------|---------------|

|                                    |                                                                                                                                                                                 |            |
|------------------------------------|---------------------------------------------------------------------------------------------------------------------------------------------------------------------------------|------------|
| BACI                               | <a href="https://doi.org/10.17871/BACI.224">https://doi.org/10.17871/BACI.224</a>                                                                                               | 03-10-2019 |
| ERA5-land                          | <a href="https://doi.org/10.24381/cds.e2161bac">https://doi.org/10.24381/cds.e2161bac</a>                                                                                       | 05-06-2020 |
| FLUXCOM-RS                         | <a href="https://doi.org/10.17871/FLUXCOM_EnergyFluxes_v1">https://doi.org/10.17871/FLUXCOM_EnergyFluxes_v1</a><br>LE.RS.EBC-BWR.MLM-ANN.METEO-NONE.4320_2160.monthly           | 02-10-2019 |
| FLUXCOM-MET<br>or FLUXCOM-<br>METa | <a href="https://doi.org/10.17871/FLUXCOM_EnergyFluxes_v1">https://doi.org/10.17871/FLUXCOM_EnergyFluxes_v1</a><br>LE.RS_METEO.EBC-BWR.MLM-MARS.METEO-GSWP3.720_360.monthly     | 02-10-2019 |
| FLUXCOM-MET<br>FLUXCOM-<br>METb    | <a href="https://doi.org/10.17871/FLUXCOM_EnergyFluxes_v1">https://doi.org/10.17871/FLUXCOM_EnergyFluxes_v1</a><br>LE.RS_METEO.EBC-ALL.MLM-ALL.METEO-CRUNCEP_v8.720_360.monthly | 15-03-2021 |
| GLEAM3.3A                          | <a href="http://www.GLEAM.eu">www.GLEAM.eu</a>                                                                                                                                  | 02-09-2019 |
| GLEAM3.3B                          | <a href="http://www.GLEAM.eu">www.GLEAM.eu</a>                                                                                                                                  | 02-09-2019 |
| GLEAM3.5A                          | <a href="http://www.GLEAM.eu">www.GLEAM.eu</a>                                                                                                                                  | 18-03-2021 |
| GLEAM3.5B                          | <a href="http://www.GLEAM.eu">www.GLEAM.eu</a>                                                                                                                                  | 18-03-2021 |
| MOD16                              | <a href="http://files.ntsg.umt.edu/data/NTSG_Products/MOD16/">http://files.ntsg.umt.edu/data/NTSG_Products/MOD16/</a><br>MOD16A2_MONTHLY.MERRA_GMAO_1kmALB/GEOTIFF_0.05degree/  | 01-10-2019 |
| PML                                | <a href="https://data.csiro.au/collections/#collection/CiCSIRO:17375v2">https://data.csiro.au/collections/#collection/CiCSIRO:17375v2</a>                                       | 09-04-2019 |
| PLSH                               | <a href="http://files.ntsg.umt.edu/data/ET_global_monthly/Global_8kmResolution/">http://files.ntsg.umt.edu/data/ET_global_monthly/Global_8kmResolution/</a>                     | 30-09-2019 |
| SEBS                               | <a href="http://en.tpdatabase.cn/portal/MetaDataInfo.jsp?MetaDataId=249454">http://en.tpdatabase.cn/portal/MetaDataInfo.jsp?MetaDataId=249454</a>                               | 09-04-2019 |
| SRB-GEWEX                          | <a href="https://disc.gsfc.nasa.gov/datasets/WC_PM_ET_050_1/summary">https://disc.gsfc.nasa.gov/datasets/WC_PM_ET_050_1/summary</a>                                             | 01-10-2019 |

43  
44  
45

### S3. Weighting groups

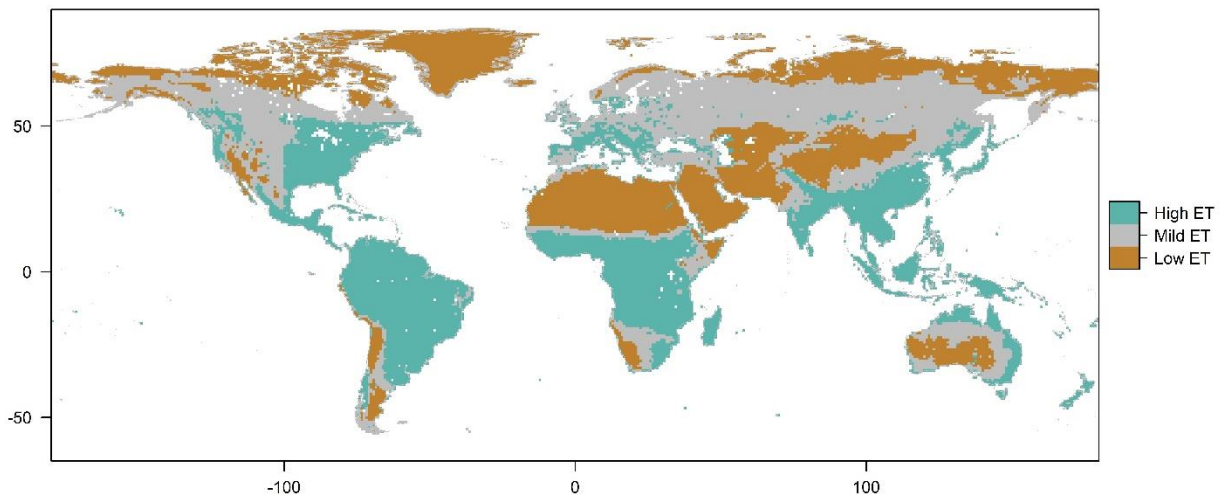

46  
47  
48  
49  
50

Figure S4: Classification of the land into three distinct broad ET regimes according to two aspects of ET, mean annual total ET and within-year relative variability throughout 1980 – 2018, derived from GLEAM V3.5a, and using K-means unsupervised classification.

### S4. Bias correction strategies

In DOLCE V1, we showed that part of the success of the weighting approach is due to the bias correction applied before the weighting. Within each tier, the bias correction is applied simply by adding the mean difference between a product and tower data uniformly to all values of a product before the weights are derived – it is constant in space and time for a given product within one tier. The grouping strategies detailed above examine the effect of considering different bias correction and weighting subgroups

57 within each spatiotemporal tier, with groups divided by region (continents, latitudes, or ET regimes)  
58 or/and seasons. As an alternative to the grouping strategies, we also investigate if deriving a spatially  
59 varying bias correction within each tier could further improve the weighting. A spatially varying bias  
60 correction might better capture the performance deficiencies of each the parent datasets.

61

62 To derive a global bias correction for a particular parent dataset within each tier, we first compute the  
63 mean bias at each flux tower site across all the time records within the tier. We then assign those ET  
64 bias values, or bias field, to the grid cells containing the sites. Finally, using the bias values at these grid  
65 cells, we extrapolate the bias field spatially to the entire global land domain within the tier using several  
66 different extrapolation strategies, including inverse distance weighting (IDW), local polynomial  
67 interpolation and nearest neighbourhood. As with the different weighting groups, we test the  
68 effectiveness of each approach using out-of-sample tests. The hybrid ET estimates derived by  
69 implementing spatially varying bias correction strategies failed to outperform the parent datasets in the  
70 out-of-sample site tests. Figure S5 shows the results of out-of-sample tests for the bias correction  
71 approach that uses IDW.

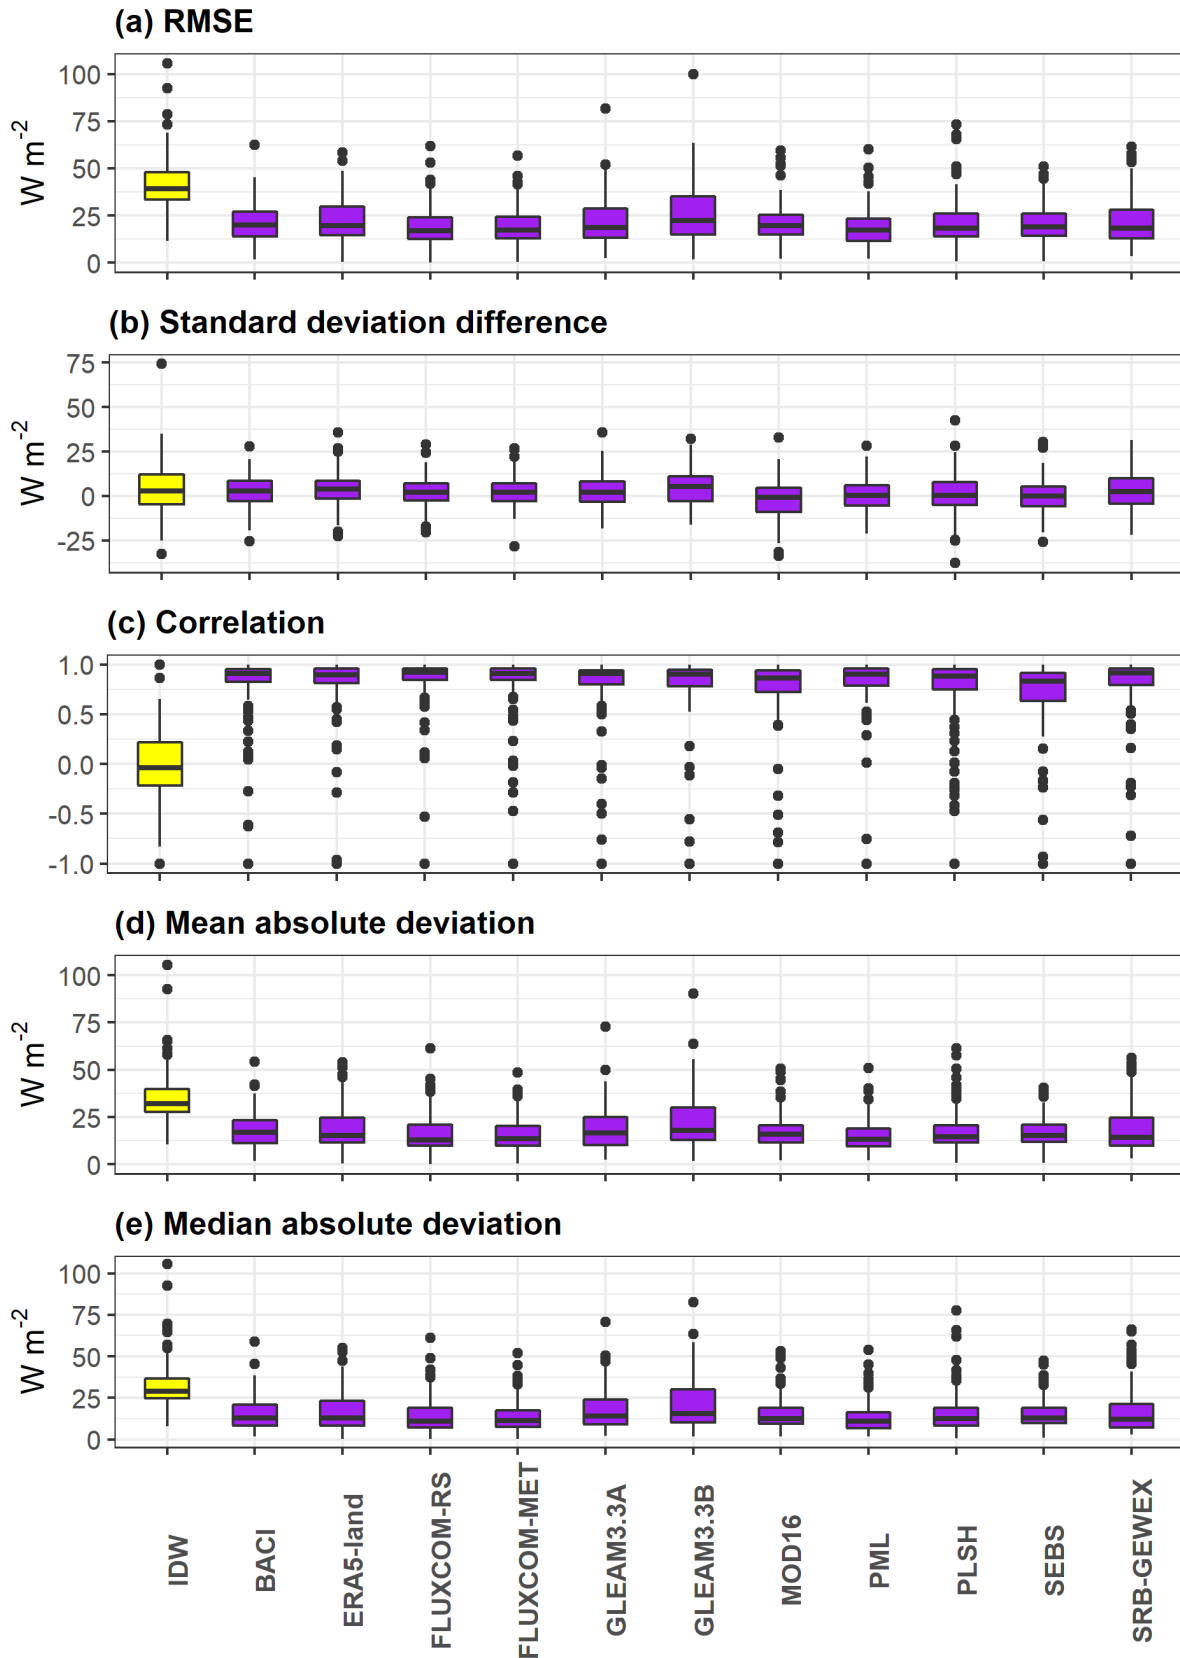

73 Figure S5: Results of the out-of-sample test across five metrics of performance, (a) RMSE, (b) Correlation  
74 (c) Standard deviation difference, (d) Mean absolute deviation, and (e) Median absolute deviation. Box  
75 plots represent spread over 1000 different selections of out-of-sample sites. The yellow box plot  
76 represents the performance results of weighting using IDW bias correction strategy, while the purple  
77 boxplots represent performance results of the parent datasets.

78

## 79 S5. Performance of weighting group strategies

80 The results of out-of-sample performance of different grouping strategies (including no grouping)  
81 against the 11 parent datasets of DOLCE V2 (left column) are presented in Fig. S6. The performance  
82 results across all 1000 different random site samples are shown in a boxplot for each clustering method  
83 (yellow), non-clustered weighting (as per DOLCE V1, in magenta, labelled NO.GROUPING), and each  
84 parent dataset (purple). The hybrid ET estimates derived from grouped weighting are labelled  
85 LAT.ZONES, CONTINENTS, SEASONS, MONTHS, and HEMISPHERE, following the grouping approaches  
86 outlined above. The plots in the left column show that overall, the hybrid ET estimates outperform their  
87 11 parent datasets across all the performance metrics and in all clustering settings. To highlight the  
88 differences between the grouping strategies, we magnify the leftmost section of these plots in the right  
89 column of Fig. S6, and we also show in red the median value of each boxplot. Results only change  
90 slightly across the grouping approaches, with the best results achieved by grouping weights by months.  
91 Despite the relatively small improvement offered by this strategy at the out-of-sample sites over the  
92 other grouping strategies, we derive DOLCE V2 (Hobeichi, 2020) by applying a grouped weighting by  
93 months. We recall that in this approach, the observational and gridded ET data are split into two groups,  
94 one covering the period June – November and the other covering December – May. Weighting and bias  
95 correction is then implemented in each group separately for each tier to create the subsets from which  
96 the hybrid ET product is derived.

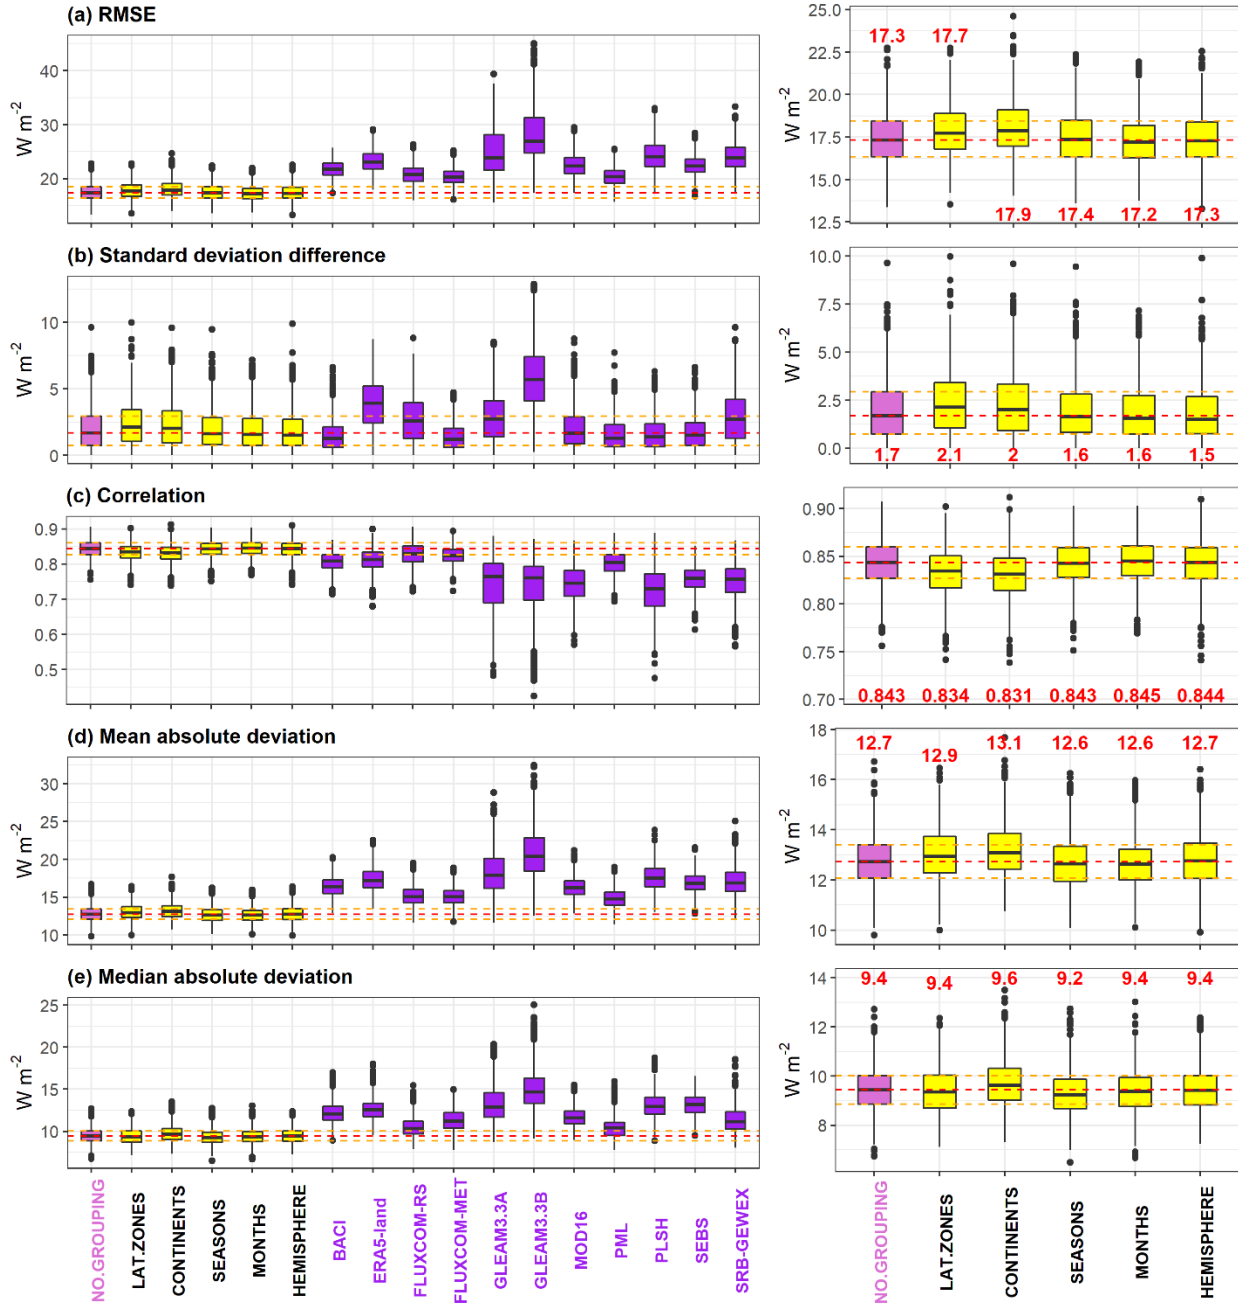

97  
 98 Figure S6: Results of the out-of-sample test across five metrics of performance, (a) RMSE, (b) Correlation  
 99 (c) Standard deviation difference, (d) Mean absolute deviation, and (e) Median absolute deviation. Box  
 100 plots represent spread over 1000 different selections of out-of-sample sites. Different clustering  
 101 methods (yellow) include: no clustering (NO.GROUPING; shown in magenta and horizontal dashed  
 102 lines), by latitude (LAT.ZONES), by continents (CONTINENTS), by seasons (SEASONS), by months  
 103 (MONTHS), and by hemisphere (HEMISPHERE), the red text marks the median values. Performance  
 104 comparison with each of the parent datasets is shown in purple.  
 105

106 The box plots in Fig. S7 show the ratio  $\frac{\text{Uncertainty}_{\text{in-sample}}}{\text{Uncertainty}_{\text{out-sample}}}$  obtained across the different grouping  
 107 techniques. Each boxplot represents this ratio from all sites out of sample and shows that over half of  
 108 the data, the ratio ranges between 0.83 and 1.51, with a median very close to 1. This confirms that,  
 109 overall, when the uncertainty estimates are computed out of sample, they are very similar to what they  
 110 would have been if they were computed in sample. Also, the fact the shift in ratio is mostly towards  
 111 values bigger than 1 rather than smaller than 1 indicates that  $\text{Uncertainty}_{\text{in-sample}}$  is greater than  
 112  $\text{Uncertainty}_{\text{out-sample}}$  so that uncertainty is overestimated rather than underestimated. Interestingly,  
 113 the lower (0.86) and upper (1.46) quartiles achieved by grouping weighting by months are the closest to  
 114 1 than the other grouping techniques. This suggests that overall, grouping weighting by months is able  
 115 to derive slightly more robust uncertainty estimates than the other techniques.  
 116

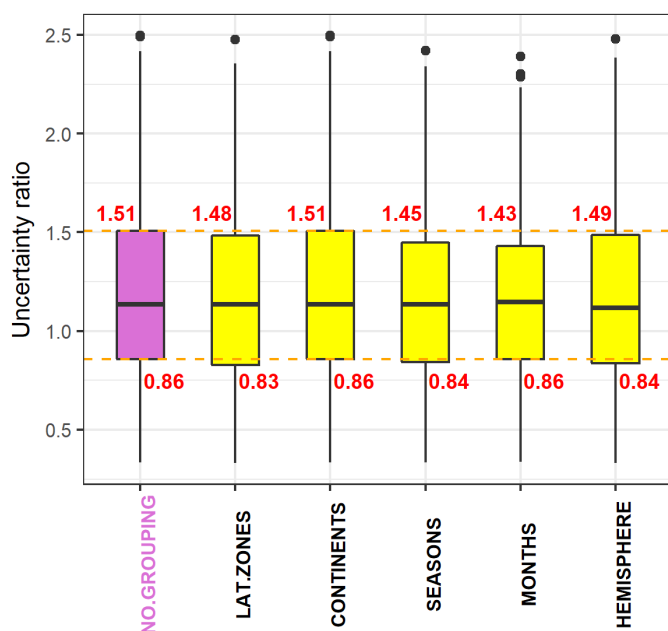

117  
 118 Figure S7: Box and whisker plots displaying the ratio  $\frac{\text{Uncertainty}_{\text{in-sample}}}{\text{Uncertainty}_{\text{out-sample}}}$ , computed for each site using  
 119 the clustering methods defined in Sect. 2.2.4. Labeling and colors are as in Fig. S6. Red text marks the  
 120 value of the upper quantile (75%) and lower quantile (25%).

121

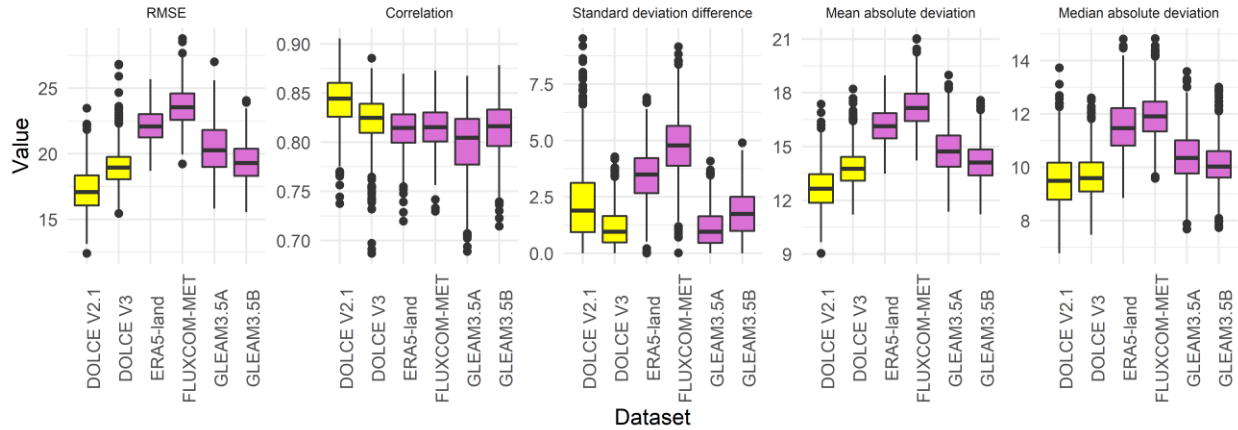

122  
 123 Figure S8: Results of the out-of-sample test comparing DOLCE V3 with DOLCE V2.1 (both in yellow) and  
 124 each of its parent datasets (purple) across five metrics of performance, RMSE, Correlation, Standard  
 125 deviation difference , Mean absolute deviation , and Median absolute deviation. Box plots represent  
 126 spread over 1000 different selections of out-of-sample sites.

127  
 128

129 **S6. Comparison of DOLCE V3 with its parent datasets**

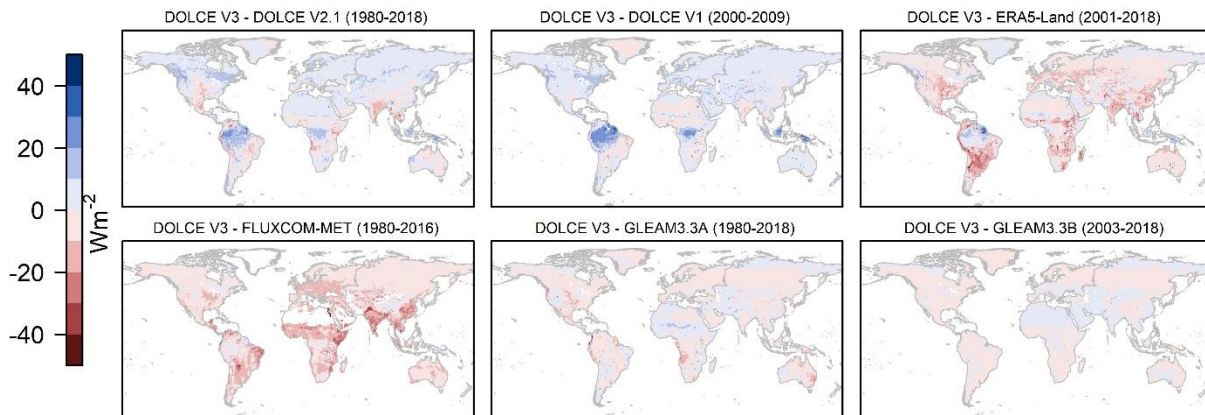

130  
 131 Figure S9: Spatial distribution of differences in ET climatology between DOLCE V3 and each of its parent  
 132 datasets and DOLCE V2. Different spatiotemporal masks are applied for each comparison based on the  
 133 spatiotemporal coverage of DOLCE V3 and the other datasets.



134  
135

## S7. Performance of DOLCE V2 at flux sites

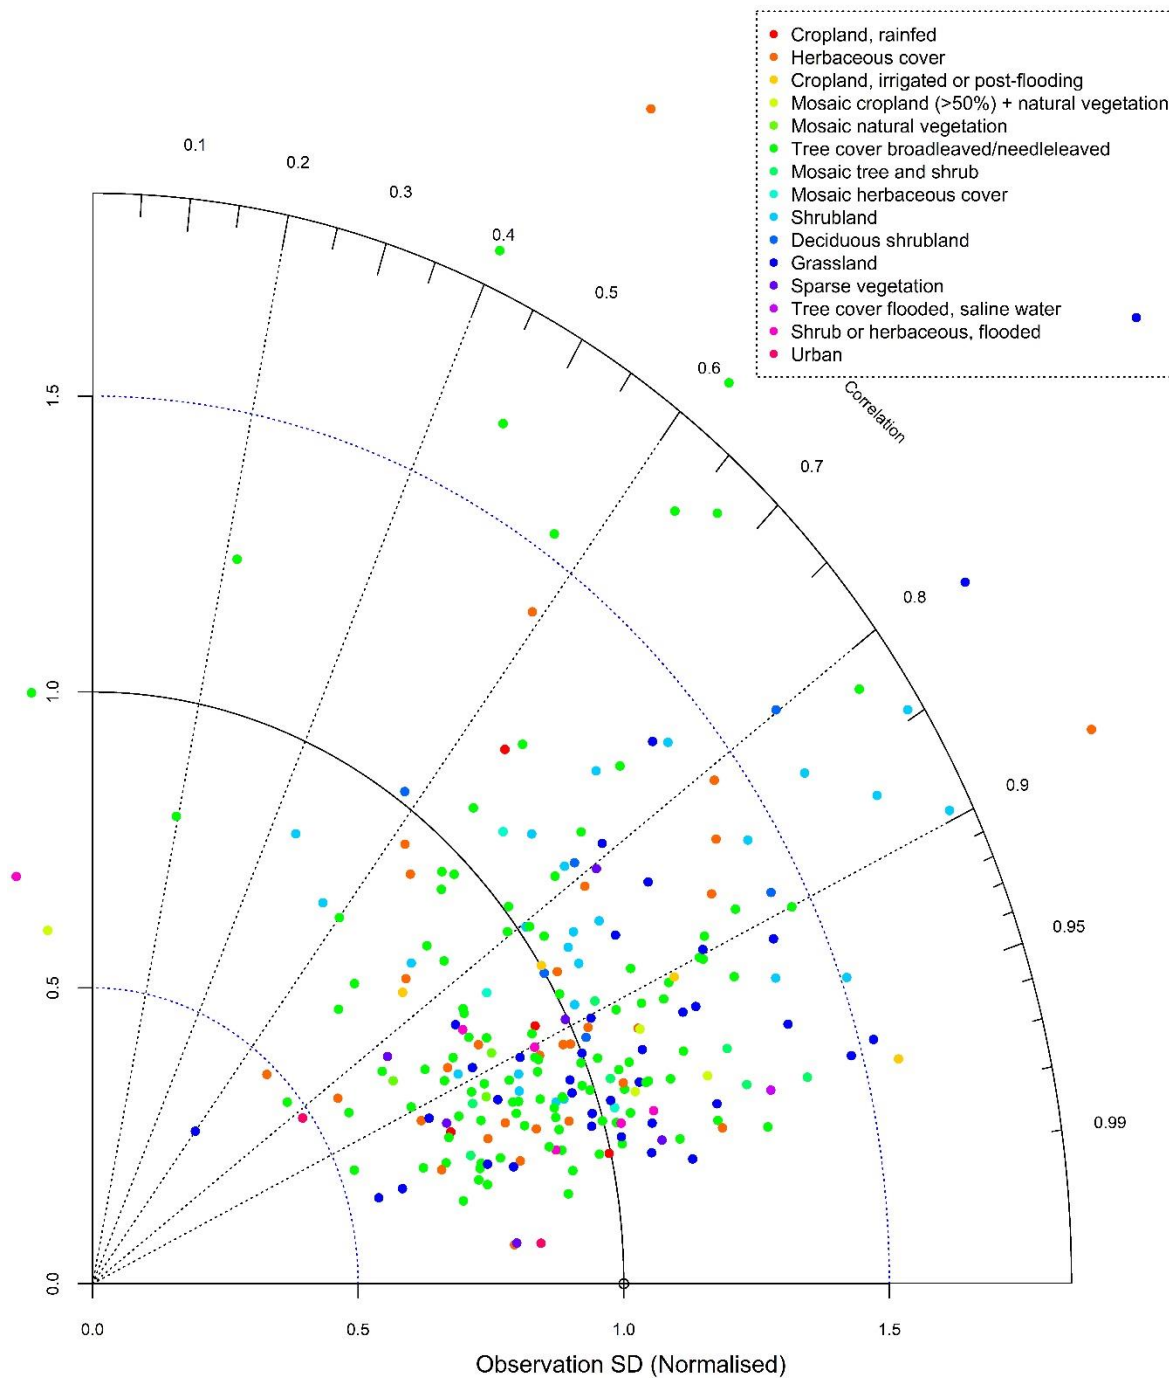

136  
137  
138  
139  
140

Figure S10: Taylor Diagram displaying two statistical metrics i.e., correlation and standard deviation of DOLCE V2 relative to normalised observational data presented by a hollow point (reference point) at one unit on the x-axis. Statistics points are color-coded by the land cover of the sites they represent. Land covers at the site locations are based on land cover maps from the European Space Agency (ESA;

141 <http://www.esa.int/>). All broadleaved and needleleaved tree covers were combined together in a single  
 142 land cover 'Tree cover broadleaved/needleleaved'.  
 143

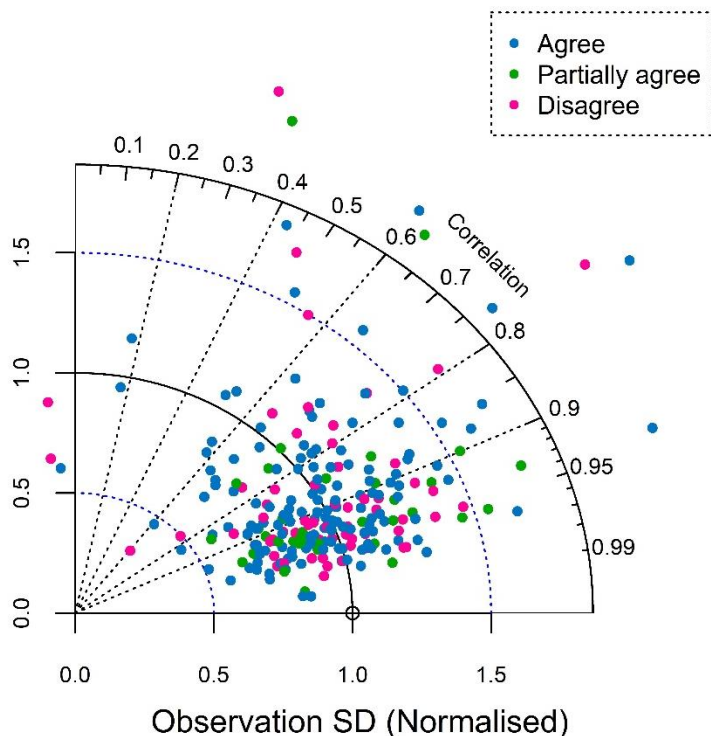

144  
 145  
 146 Figure S11: Taylor Diagram displaying two statistical metrics i.e., correlation and standard deviation of  
 147 DOLCE V2 relative to normalised observational data presented by a hollow point (reference point) at  
 148 one unit on the x-axis. Blue points represent sites whose land types match the dominant land types of  
 149 the underlying grid-cells; green points represent sites whose land types cover more than 25% of the  
 150 underlying grid-cells without being the dominant land cover at these grid-cells; and pink points  
 151 representing sites whose land types covers less than 25% of the underlying grid-cells. Land cover types  
 152 at the sites' footprint and the underlying grid-cells are determined based on land cover maps from the  
 153 European Space Agency.

154  
 155 **S8. Comparison of DOLCE V2 with DOLCE V1 and Conserving**  
 156 **Land Atmosphere Synthesis Suite (CLASS-ET)**

157 Table S3: Area weighted mean ET ( $Wm^{-2}$ ) computed for DOLCE V2, DOLCE V1 and CLASS-ET and  
 158 averaged over each of Africa, Australia, Eurasia, North America, South America and the global land  
 159 excluding Antractica. The differences between DOLCE V2 and each of DOLCE V1 and CLASS-ET are shown  
 160 in columns 5 and 6 respectively.

|        | DOLCE V2 | DOLCE V1 | CLASS | DOLCE V2 – DOLCE V1 | DOLCE V2 – CLASS |
|--------|----------|----------|-------|---------------------|------------------|
| Africa | 40.1     | 35.8     | 36.3  | 4.3                 | 3.8              |

|                                  |      |      |      |     |      |
|----------------------------------|------|------|------|-----|------|
| Australia                        | 25.4 | 23   | 26.1 | 2.4 | -0.7 |
| Eurasia                          | 29.3 | 28   | 27.7 | 1.3 | 1.6  |
| North America                    | 33.2 | 30.5 | 31.1 | 2.7 | 2.1  |
| South America                    | 73.3 | 68.3 | 71.2 | 5   | 2.1  |
| Global land excluding Antarctica | 38.4 | 35.7 | 36.3 | 2.7 | 2.1  |

161

162 **S9. ET regimes**

163 Table S4: List of 6 ET regimes identified by unsupervised learning. Second column shows the  
 164 abbreviation given to each regime. Third and fourth columns display the statistics of the class's centroid:  
 165 Yearly ET total climatology (column 3) and relative within-year standard deviation of monthly ET  
 166 climatology (column 4).

| Regime description                   | Regime abbreviation   | Yearly ET total climatology (mm) | Relative standard deviation (%) |
|--------------------------------------|-----------------------|----------------------------------|---------------------------------|
| Very low ET with high variability    | V.L.ET, H.variability | 60                               | 10.5                            |
| Low ET with high variability         | L.ET, H.variability   | 250.8                            | 8.7                             |
| Mild low ET with medium variability  | M.L.ET, M.variability | 435.4                            | 7.2                             |
| Mild high ET with medium variability | M.H.ET, M.variability | 680.3                            | 4.7                             |
| High ET with low variability         | H.ET, L.variability   | 973.7                            | 2.7                             |
| Very high ET with low variability    | V.H.ET, L.variability | 1408.2                           | 0.9                             |

167

168

169 **S10. References**

170 Albert, L. P., Keenan, T. F., Burns, S. P., Huxman, T. E., and Monson, R. K.: Climate Controls Over Ecosystem Metabolism:  
 171 Insights From A Fifteen-Year Inductive Artificial Neural Network Synthesis For A Subalpine Forest, *Oecologia*, 184(1), 25-41,  
 172 2017.  
 173 Allison, V. J., Miller, R. M., Jastrow, J. D., Matamala, R., Zak, D. R.: Changes In Soil Microbial Community Structure In A Tallgrass  
 174 Prairie Chronosequence, *Soil Science Society Of America Journal*, 69(5), 1412-1421, 2005.  
 175 Amiro, B. D., Barr, A. G., Barr, J. G., Black, T. A., Bracho, R., Brown, M., Chen, J., Clark, K. L., Davis, K. J., Desai, A. R., Dore, S.,  
 176 Engel, V., Fuentes, J. D., Goldstein, A. H., Goulden, M. L., Kolb, T. E., Lavigne, M. B., Law, B. E., Margolis, H. A., Martin, T.,

177 McCaughey, J. H., Misson, L., Montes-Helu, M., Noormets, A., Randerson, J. T., Starr, and G., Xiao, J.: (2010) Ecosystem Carbon  
178 Dioxide Fluxes After Disturbance In Forests Of North America, *J. Geophys. Res. Atmos.*, 115(G00K02).

179 Anderson, R. G., Tirado-Corbalá, R., Wang, D., and Ayars, J. E.: Long-Rotation Sugarcane In Hawaii Sustains High Carbon  
180 Accumulation And Radiation Use Efficiency In 2nd Year Of Growth, *Agriculture, Ecosystems & Environment*, 199, 216-224,  
181 2015.

182 Anderson-Teixeira, K. J., Delong, J. P., Fox, A. M., Brese, D. A., and Litvak, M. E.: Differential Responses Of Production And  
183 Respiration To Temperature And Moisture Drive The Carbon Balance Across A Climatic Gradient In New Mexico, *Glob. Chang.*  
184 *Biol.*, 17(1), 410-424, 2011.

185 Andrykanus, R.: Howard Springs Understory\_old\_20131128 OzFlux: Australian and New Zealand Flux Research and Monitoring  
186 hdl: 102.100.100/14224, 2012.

187 Antunes, M. A. H., Walter-Shea, E. A., and Mesarch, M. A.: Test Of An Extended Mathematical Approach To Calculate Maize Leaf  
188 Area Index And Leaf Angle Distribution, *Agric. For. Meteorol.*, 108(1), 45-53, 2001.

189 Arain, M. A. and Restrepo-Coupe, N.: Net Ecosystem Production In A Temperate Pine Plantation In Southeastern Canada, *Agric.*  
190 *For. Meteorol.*, 128(3-4), 223-241, 2005.

191 Bagley, J. E., Kueppers, L. M., Billesbach, D. P., Williams, I. N., Biraud, S. C., and Torn, M. S.: The Influence Of Land Cover On  
192 Surface Energy Partitioning And Evaporative Fraction Regimes In The U.S. Southern Great Plains, *J. Geophys. Res. Atmos.:*  
193 *Atmospheres*, 122(11), 5793-5807, 2017.

194 Atmospheric Radiation Measurement (ARM) user facility, updated hourly. Eddy Correlation Flux Measurement System  
195 (30ECOR). 1997-04-25 to 2004-03-31, Southern Great Plains (SGP) Smileyberg, KS (ABLE) (A4). Compiled by R. Sullivan, M.  
196 Pekour and E. Keeler. ARM Data Center. Data set accessed 2019-09-17 at [doi:10.5439/1025039](https://doi.org/10.5439/1025039), 1997.

197 Atmospheric Radiation Measurement (ARM) user facility updated hourly. Quality Controlled Eddy Correlation Flux  
198 Measurement (30QCECOR). 2005-11-26 to 2007-01-07, ARM Mobile Facility (NIM) Niamey, Niger (M1). Compiled by R. McCoy,  
199 S. Xie and Y. Zhang. ARM Data Center. Data set accessed 2019-09-17 at [doi:10.5439/1097546](https://doi.org/10.5439/1097546), 2005.

200 Atmospheric Radiation Measurement (ARM) user facility, updated hourly. Quality Controlled Eddy Correlation Flux  
201 Measurement (30QCECOR). 2008-05-06 to 2008-12-28, ARM Mobile Facility (HFE) Shouxian, Anhui, China (M1). Compiled by R.  
202 McCoy, S. Xie and Y. Zhang. ARM Data Center. Data set accessed 2019-09-17 at [doi:10.5439/1097546](https://doi.org/10.5439/1097546), 2008.

203 Atmospheric Radiation Measurement (ARM) user facility, updated hourly. Quality Controlled Eddy Correlation Flux  
204 Measurement (30QCECOR). 2009-04-15 to 2010-09-30, ARM Mobile Facility (GRW) Graciosa Island, Azores, Portugal; AMF1  
205 (M1). Compiled by R. McCoy, S. Xie and Y. Zhang. ARM Data Center. Data set accessed 2019-09-17 at [doi:10.5439/1097546](https://doi.org/10.5439/1097546),  
206 2009.

207 Atmospheric Radiation Measurement (ARM) user facility, updated hourly. Quality Controlled Eddy Correlation Flux  
208 Measurement (30QCECOR). 2011-09-16 to 2020-05-11, North Slope Alaska (NSA) Barrow, Alaska (71.325, -156.608, 5) (E10).  
209 Compiled by R. McCoy, S. Xie and Y. Zhang. ARM Data Center. Data set accessed 2019-09-17 at [doi:10.5439/1097546](https://doi.org/10.5439/1097546), 2011.

210 Atmospheric Radiation Measurement (ARM) user facility, updated hourly. Eddy Correlation Flux Measurement System  
211 (30ECOR). 2013-12-05 to 2015-01-10, Tropical Western Pacific (TWP) East Arm, Darwin, Australia (E30). Compiled by R. Sullivan,  
212 D. Cook and E. Keeler. ARM Data Center. Data set accessed 2019-09-17 at [doi:10.5439/1025039](https://doi.org/10.5439/1025039), 2013.

213 Aurela, M., Laurila, T. and Tuovinen, J.-P.: Seasonal CO<sub>2</sub> balances of a subarctic mire, *J. Geophys. Res. Atmos.*, 106(D2), 1623–  
214 1637, doi:10.1029/2000JD900481, 2001.

215 Baker, I., Denning, A. S., Hanan, N., Prihodko, L., Uliasz, M., Vidale, P., Davis, and K., Bakwin, P.: Simulated And Observed Fluxes  
216 Of Sensible And Latent Heat And CO<sub>2</sub> At The WLEF-TV Tower Using SiB2.5, *Glob. Chang. Biol.*, 9(9), 1262-1277, 2003.

217 Baldocchi, D. D., Law, B. E., and Anthoni, P. M.: On Measuring And Modeling Energy Fluxes Above The Floor Of A Homogeneous  
218 And Heterogeneous Conifer Forest, *Agric. For. Meteorol.*, 102(2-3), 187-206, 2000.

219 Baldocchi, D., Falge, E., Gu, L., Olson, R., Hollinger, D., Running, S., Anthoni, P., Bernhofer, C., Davis, K., Evans, R., Fuentes, J.,  
220 Goldstein, A., Katul, G., Law, B., Lee, X., Malhi, Y., Meyers, T., Munger, W., Oechel, W., Paw, K. T., Pilegaard, K., Schmid, H. P.,  
221 Valentini, R., Verma, S., Vesala, T., Wilson, K. and Wofsy, S.: FLUXNET: A New Tool to Study the Temporal and Spatial Variability  
222 of Ecosystem-Scale Carbon Dioxide, Water Vapor, and Energy Flux Densities, *Bull. Am. Meteorol. Soc.*, 82(11), 2415–2434,  
223 doi:10.1175/1520-0477(2001)082<2415:FANTTS>2.3.CO;2, 2001.

224 Baldocchi, D. D., Xu, L., and Kiang, N.: How Plant Functional-Type, Weather, Seasonal Drought, And Soil Physical Properties Alter  
225 Water And Energy Fluxes Of An Oak-Grass Savanna And An Annual Grassland, *Agric. For. Meteorol.*, 123(1-2), 13-39, 2004.

226 Baldocchi, D. and Sturtevant, C.: Does day and night sampling reduce spurious correlation between canopy photosynthesis and  
227 ecosystem respiration?, *Agric. For. Meteorol.*, 207(), 117-126, 2015.

228 Baldocchi, D., Penuelas, J.: The Physics And Ecology Of Mining Carbon Dioxide From The Atmosphere By Ecosystems, *Glob.*  
229 *Chang. Biol.*, 256-257(2), 179-195, 2018.

230 Barcza, Z., Kern, A., Haszpra, L. and Kljun, N.: Spatial representativeness of tall tower eddy covariance measurements using

231 remote sensing and footprint analysis, *Agric. For. Meteorol.*, 149(5), 795–807, doi:10.1016/j.agrformet.2008.10.021, 2009.

232 Barford, C. C., Wofsy, S. C., Goulden, M. L., Munger, J. W., Pyle, E. H., Urbanski, S. P., Hutyla, L., Saleska, S. R., Fitzjarrald, D., and

233 Moore, K.: Factors Controlling Long- And Short-Term Sequestration Of Atmospheric CO<sub>2</sub> In A Mid-Latitude Forest, *Science*,

234 294(5547), 1688-1691, 2001.

235 Barr, A. G., Griffis, T. J., Black, T. A., Lee, X., Staebler, R. M., Fuentes, J. D., Chen, Z., Morgenstern, K.: Comparing The Carbon

236 Budgets Of Boreal And Temperate Deciduous Forest Stands, *Canadian Journal Of Forest Research*, 32(5), 813-822, 2002.

237 Barr, J. G., Engel, V., Fuentes, J. D., Fuller, D. O., Kwon, H.: Modeling Light Use Efficiency In A Subtropical Mangrove Forest

238 Equipped With Co<sub>2</sub> Eddy Covariance, *Biogeosciences*, 10(3), 2145-2158, 2013.

239 Barron-Gafford, G. A., Scott, R. L., Jenerette, G. D., Hamerlynck, E. P., Huxman, T. E. (2013) Landscape And Environmental

240 Controls Over Leaf And Ecosystem Carbon Dioxide Fluxes Under Woody Plant Expansion, *Journal Of Ecology*, 101(6), 1471-1483

241 Belshe, E. F., Schuur, E. A., Bolker, B. M., and Bracho, R.: Incorporating Spatial Heterogeneity Created By Permafrost Thaw Into

242 A Landscape Carbon Estimate, *J. Geophys. Res. Atmos.: Biogeosciences*, 117(G1), 2012.

243 Belleli Marchesini, L., Papale, D., Reichstein, M., Vuichard, N., Tchebakova, N. and Valentini, R.: Carbon balance assessment of a

244 natural steppe of southern Siberia by multiple constraint approach, *Biogeosciences*, 4(4), 581–595, doi:10.5194/bg-4-581-2007,

245 2007.

246 Bell, T. W., Menzer, O., Troyo-Diéquez, E., Oechel, W. C.: Carbon Dioxide Exchange Over Multiple Temporal Scales In An Arid

247 Shrub Ecosystem Near La Paz, Baja California Sur, Mexico, *Glob. Chang. Biol.*, 18(8), 2570-2582, 2012.

248 Beringer, J.: Adelaide River OzFlux tower site OzFlux: Australian and New Zealand Flux Research and Monitoring hdl:

249 102.100.100/14228, 2013a.

250 Beringer, J.: Dry River OzFlux tower site OzFlux, Australian and New Zealand Flux Research and Monitoring hdl:

251 102.100.100/14229, 2013b.

252 Beringer, J.: Fogg Dam OzFlux tower site OzFlux, Australian and New Zealand Flux Research and Monitoring hdl:

253 102.100.100/14233, 2013c.

254 Beringer, J.: Sturt Plains OzFlux tower site OzFlux, Australian and New Zealand Flux Research and Monitoring hdl:

255 102.100.100/14230, 2013d.

256 Beringer, J.: Yanco JAXA OzFlux tower site OzFlux, Australian and New Zealand Flux Research and Monitoring hdl:

257 102.100.100/14235, 2013e.

258 Beringer, J.: Wallaby Creek OzFlux tower site OzFlux, Australian and New Zealand Flux Research and Monitoring hdl:

259 102.100.100/14231, 2013f.

260 Beringer, J.: Red Dirt Melon Farm OzFlux tower site OzFlux: Australian and New Zealand Flux Research and Monitoring hdl:

261 102.100.100/14245, 2014a.

262 Beringer, J., :Riggs Creek OzFlux tower site OzFlux, Australian and New Zealand Flux Research and Monitoring hdl:

263 102.100.100/14246, 2014b.

264 Beringer, J.: Whroo OzFlux site OzFlux, Australian and New Zealand Flux Research and Monitoring hdl: 102.100.100/52559,

265 2017.

266 Biederman, J. A., Scott, R. L., Goulden, M. L., Vargas, R., Litvak, M. E., Kolb, T. E., Yezpe, E. A., Oechel, W. C., Blanken, P. D., Bell,

267 T. W., Garatuza-Payan, J., Maurer, G. E., Dore, S., and Burns, S. P.: Terrestrial Carbon Balance In A Drier World: The Effects Of

268 Water Availability In Southwestern North America, *Glob. Chang. Biol.*, 22(5), 1867-1879, 2016.

269 Billesbach, D. and Arkebauer, T. J. : AmeriFlux US-SdH Nebraska SandHills Dry Valley, Dataset, doi:10.17190/AMF/1246136,

270 2004.

271 Bodesheim, J.: BACI v1, Upscaled diurnal cycles of carbon and energy fluxes. Max Planck Institute for Biogeochemistry, Jena,

272 (accessed on 3 October 2019), <https://doi.org/10.17871/BACI.224>, 2017.

273 Burba, G. G. and Verma, S. B.: Prairie Growth, PAR Albedo And Seasonal Distribution Of Energy Fluxes, *Agric. For. Meteorol.*,

274 107(3), 227-240, 2001.

275 Burton, A. J. and Pregitzer, K. S.: Measurement Carbon Dioxide Concentration Does Not Affect Root Respiration Of Nine Tree

276 Species In The Field, *Tree Physiology*, 22(1), 67-72, 2002.

277 Calperum Tech; Calperum Chowilla OzFlux tower site OzFlux: Australian and New Zealand Flux Research and Monitoring hdl:

278 102.100.100/14236, 2013.

279 Campbell, J. L., Sun, O. J., and Law, B. E.: Disturbance And Net Ecosystem Production Across Three Climatically Distinct Forest

280 Landscapes, *Global Biogeochem. Cycles*, 18(4), 2004.

281 Castro, M. S., Gholz, H. L., Clark, K. L., Steudler, P. A.: Effects Of Forest Harvesting On Soil Methane Fluxes In Florida Slash Pine

282 Plantations, *Canadian Journal Of Forest Research*, 30(10), 1534-1542, 2000.

283 Cescatti, A. and Zorer, R.: Structural acclimation and radiation regime of silver fir (*Abies alba* Mill.) shoots along a light gradient,

284 *Plant, Cell Environ.*, 26(3), 429–442, doi:10.1046/j.1365-3040.2003.00974.x, 2003.

285 Chen, J. M., Govind, A., Sonnentag, O., Zhang, Y., Barr, and A., Amiro, B.: Leaf Area Index Measurements At Fluxnet-Canada  
286 Forest Sites, *Agric. For. Meteorol.*, 140(1-4), 257-268, 2006.

287 Chen, X.: Surface energy balance based global land evapotranspiration (SEBS) Daily ET dataset: (accessed on 9 April 2019),  
288 <http://en.tpdatabase.cn/portal/MetaDataInfo.jsp?MetaDataId=249454>, 2017.

289 Chi, J., Maureira, F., Waldo, S., Pressley, S. N., Stöckle, C. O., O'Keeffe, P. T., Pan, W. L., Brooks, E. S., Huggins, and D. R., Lamb, B.  
290 K.: Carbon And Water Budgets In Multiple Wheat-Based Cropping Systems In The Inland Pacific Northwest Us: Comparison Of  
291 Cropsyst Simulations With Eddy Covariance Measurements, *Frontiers In Ecology And Evolution*, 5, 25-36, 2017a.

292 Chi, J., Waldo, S., Pressley, S. N., Russell, E. S., O'Keeffe, P. T., Pan, W. L., Huggins, D. R., Stöckle, C. O., Brooks, E. S., and Lamb, B.  
293 K.: Effects Of Climatic Conditions And Management Practices On Agricultural Carbon And Water Budgets In The Inland Pacific  
294 Northwest Usa, *J. Geophys. Res. Atmos.: Biogeosciences*, 122(12), 3142-3160, 2017b.

295 Chu, H., Baldocchi, D. D., Poindexter, C., Abraha, M., Desai, A. R., Bohrer, G., Arain, M. A., Griffis, T., Blanken, P. D., O'Halloran,  
296 T. L., Thomas, R. Q., Zhang, Q., Burns, S. P., Frank, J. M., Christian, D., Brown, S., Black, T. A., Gough, C. M., Law, B. E., Lee, X.,  
297 Chen, J., Reed, D. E., Massman, W. J., Clark, K., Hatfield, J., Prueger, J., Bracho, R., Baker, J. M., and Martin, T. A.: Temporal  
298 Dynamics Of Aerodynamic Canopy Height Derived From Eddy Covariance Momentum Flux Data Across North American Flux  
299 Networks, *Geophysical Research Letters*, 45(5), 9275–9287, 2018.

300 Cleverly, J.: Ti Tree East OzFlux Site OzFlux: Australian and New Zealand Flux Research and Monitoring hdl: 102.100.100/14225,  
301 2013.

302 Cleverly, J., Boulain, N., Villalobos-Vega, R., Grant, N., Faux, R., Wood, C., Cook, P. G., Yu, Q., Leigh, A., and Eamus, D.: Dy-  
303 namics of component carbon fluxes in a semi-arid Acacia wood- land, central Australia, *J. Geophys. Res.-Biogeo.*, 118, 1168–  
304 1185, 2013.

305 Conte, M. H., Weber, J. C., Carlson, P. J., Flanagan, L. B.: Molecular And Carbon Isotopic Composition Of Leaf Wax In Vegetation  
306 And Aerosols In A Northern Prairie Ecosystem, *Oecologia*, 135(1), 67-77, 2003.

307 Copernicus Climate Change Service (C3S): C3S ERA5-Land reanalysis. Copernicus Climate Change Service, (accessed on 11  
308 October 2019), <https://cds.climate.copernicus.eu/cdsapp#!/home>, 2019.

309 Ershadi, A., McCabe, M. F., Evans, J. P., Chaney, N. W. and Wood, E. F.: Multi-site evaluation of terrestrial evaporation models  
310 using FLUXNET data, *Agric. For. Meteorol.*, 187, 46–61, doi:10.1016/j.agrformet.2013.11.008, 2014.

311 Eugster, W., Rouse, W. R., Pielke Sr, R. A., Mcfadden, J. P., Baldocchi, D. D., Kittel, T. G. F., Chapin, F. S., Liston, G. E., Vidale, P. L.,  
312 Vaganov, E. and Chambers, S.: Land-atmosphere energy exchange in Arctic tundra and boreal forest: available data and  
313 feedbacks to climate, *Glob. Chang. Biol.*, 6(S1), 84–115, doi:10.1046/j.1365-2486.2000.06015.x, 2000.

314 Euskirchen, E. S., Bret-Harte, M. S., Shaver, G. R., Edgar, C. W., and Romanovsky, V. E.: Long-Term Release Of Carbon Dioxide  
315 From Arctic Tundra Ecosystems In Alaska, *Ecosystems*, 20(5), 960-974, 2017.

316 Ewenz, C.: Loxton OzFlux tower site OzFlux: Australian and New Zealand Flux Research and Monitoring hdl: 102.100.100/20838,  
317 2015.

318 Galvagno, M., Wohlfahrt, G., Cremonese, E., Rossini, M., Colombo, R., Filippa, G., Julitta, T., Manca, G., Siniscalco, C., Morra di  
319 Cella, U. and Migliavacca, M.: Phenology and carbon dioxide source/sink strength of a subalpine grassland in response to an  
320 exceptionally short snow season, *Environ. Res. Lett.*, 8, 025008, doi:10.1088/1748-9326/8/2/025008, 2013.

321 Gash, J. H. C. and Dolman, A. J.: Sonic anemometer (co)sine response and flux measurement I. The potential for (co)sine error to  
322 affect sonic anemometer-based flux measurements, *Agric. For. Meteorol.*, 119, 195–207, doi:10.1016/S0168-1923(03)00137-0,  
323 2003.

324 Gilmanov, T. G., Soussana, J. F., Aires, L., Allard, V., Ammann, C., Balzarolo, M., Barcza, Z., Bernhofer, C., Campbell, C. L.,  
325 Cernusca, A., Cescatti, A., Clifton-Brown, J., Dirks, B. O. M., Dore, S., Eugster, W., Fuhrer, J., Gimeno, C., Gruenwald, T., Haszpra,  
326 L., Hensen, A., Ibrom, A., Jacobs, A. F. G., Jones, M. B., Lanigan, G., Laurila, T., Lohila, A., G.Manca, Marcolla, B., Nagy, Z.,  
327 Pilegaard, K., Pinter, K., Pio, C., Raschi, A., Rogiers, N., Sanz, M. J., Stefani, P., Sutton, M., Tuba, Z., Valentini, R., Williams, M. L.  
328 and Wohlfahrt, G.: Partitioning European grassland net ecosystem CO<sub>2</sub> exchange into gross primary productivity and ecosystem  
329 respiration using light response function analysis, *Agric. Ecosyst. Environ.*, 121(1–2), 93–120, doi:10.1016/j.agee.2006.12.008,  
330 2007.

331 Gilmanov, T. G., Aires, L., Barcza, Z., Baron, V. S., Belelli, L., Beringer, J., Billesbach, D., Bonal, D., Bradford, J., Ceschia, E., Cook,  
332 D., Corradi, C., Frank, A., Gianelle, D., Gimeno, C., Gruenwald, T., Guo, H., Hanan, N., Haszpra, L., Heilman, J., Jacobs, A., Jones,  
333 M. B., Johnson, D. A., Kiely, G., Li, S., Magliulo, V., Moors, E., Nagy, Z., Nasyrov, M., Owensby, C., Pinter, K., Pio, C., Reichstein,  
334 M., Sanz, M. J., Scott, R., Soussana, J. F., Stoy, P. C., Svejcar, T., Tuba, Z. and Zhou, G.: Productivity, Respiration, and Light-  
335 Response Parameters of World Grassland and Agroecosystems Derived From Flux-Tower Measurements, *Rangel. Ecol. Manag.*,  
336 63(1), 16–39, doi:10.2111/REM-D-09-00072.1, 2010.

337 Hilton, T. W., Davis, K. J. and Keller, K.: Evaluating terrestrial CO<sub>2</sub> flux diagnoses and uncertainties from a simple land surface  
338 model and its residuals, *Biogeosciences*, 11, 217–235, doi:10.5194/bg-11-217-2014, 2014.

339 Hirano, T., Segah, H., Harada, T., Limin, S., June, T., Hirata, R. and Osaki, M.: Carbon dioxide balance of a tropical peat swamp  
340 forest in Kalimantan, Indonesia, *Glob. Chang. Biol.*, 13(2), 412–425, doi:10.1111/j.1365-2486.2006.01301.x, 2007.

341 Hirata, R., Saigusa, N., Yamamoto, S., Ohtani, Y., Ide, R., Asanuma, J., Gamo, M., Hirano, T., Kondo, H., Kosugi, Y., Li, S. G., Nakai,  
342 Y., Takagi, K., Tani, M. and Wang, H.: Spatial distribution of carbon balance in forest ecosystems across East Asia, *Agric. For.*  
343 *Meteorol.*, 148(5), 761–775, doi:10.1016/j.agrformet.2007.11.016, 2008.

344 Ikawa, H., Nakai, T., Busey, R., Kim, Y., Kobayashi, H., Nagai, S., Ueyama, M., Saito, K., Nagano, H., Suzuki, R. and Hinzman, L.:  
345 Understory CO<sub>2</sub>, sensible heat, and latent heat fluxes in a black spruce forest in interior Alaska, *Agric. For. Meteorol.*, 214215,  
346 80–90, 2015.

347 Irvine, J., Law, B. E. and Hibbard, K. A.: Postfire carbon pools and fluxes in semiarid ponderosa pine in Central Oregon, *Glob.*  
348 *Chang. Biol.*, 13(8), 1748–1760, doi:10.1111/j.1365-2486.2007.01368.x, 2007.

349 King, M. D., Platnick, S., Moeller, C. C., Revercomb, H. E. and Chu, D. A.: Remote sensing of smoke, land, and clouds from the  
350 NASA ER-2 during SAFARI 2000, *J. Geophys. Res. Atmos.*, 108(D13), doi:10.1029/2002JD003207, 2003.

351 Isaac P.: Daly Regrowth OzFlux tower site\_old\_20131128 OzFlux: Australian and New Zealand Flux Research and Monitoring  
352 hdl: 102.100.100/14215, 2010.

353 Jamali, H., Livesley, S. J., Dawes, T. Z., Cook, G. D., Hutley, L. B. and Arndt, S. K.: Diurnal and seasonal variations in CH<sub>4</sub> flux from  
354 termite mounds in tropical savannas of the Northern Territory, Australia, *Agric. For. Meteorol.*, 151(11), 1471–1479,  
355 doi:10.1016/j.agrformet.2010.06.009, 2011.

356 Keppel-Aleks, G., Wennberg, P. O., Washenfelder, R. A., Wunch, D., Schneider, T., Toon, G. C., Andres, R. J., Blavier, J.-F.,  
357 Connor, B., Davis, K. J., Desai, A. R., Messerschmidt, J., Notholt, J., Roehl, C. M., Sherlock, V., Stephens, B. B., Vay, S. A., and  
358 Wofsy, S. C.: The imprint of surface fluxes and transport on variations in total column carbon dioxide, *Biogeosciences*, 9, 875–  
359 891, doi:10.5194/bg-9-875-2012, 2012.

360 Jung, M. et al.: FLUXCOM Global Land Energy Fluxes. Max Planck Institute for Biogeochemistry, Jena, (accessed on 2 October  
361 2019), [https://doi.org/10.17871/FLUXCOM\\_EnergyFluxes\\_v1](https://doi.org/10.17871/FLUXCOM_EnergyFluxes_v1) (2018)

362 Lafleur, P. M., Roulet, N. T., Bubier, J. L., Frohling, S. and Moore, T. R.: Interannual variability in the peatland-atmosphere carbon  
363 dioxide exchange at an ombrotrophic bog, *Global Biogeochem. Cycles*, 17(2), 1036, doi:10.1029/2002GB001983, 2003.

364 Laubach, J.: Beacon Farm OzFlux: Australian and New Zealand Flux Research and Monitoring hdl: 102.100.100/26730, 2016.

365 Li, X., Liang, S., Yu, G., Yuan, W., Cheng, X., Xia, J., Zhao, T., Feng, J., Ma, Z., Ma, M., Liu, S., Chen, J., Shao, C., Li, S., Zhang, X.,  
366 Zhang, Z., Chen, S., Ohta, T., Varlagin, A., Miyata, A., Takagi, K., Saigusa, N. and Kato, T.: Estimation of gross primary production  
367 over the terrestrial ecosystems in China, *Ecol. Modell.*, 261–262, 80–92, doi:10.1016/j.ecolmodel.2013.03.024, 2013.

368 Liddell, M.: Cape Tribulation OzFlux tower site OzFlux: Australian and New Zealand Flux Research and Monitoring hdl:  
369 102.100.100/14242, 2013a

370 Liddell, M.: Robson Creek OzFlux tower site OzFlux: Australian and New Zealand Flux Research and Monitoring hdl:  
371 102.100.100/14243, 2013b.

372 Loubet, B., Laville, P., Lehuger, S., Larmanou, E., Fléchar, C., Mascher, N., Genermont, S., Roche, R., Ferrara, R. M., Stella, P.,  
373 Personne, E., Durand, B., Decuq, C., Flura, D., Masson, S., Fanucci, O., Rampon, J.-N., Siemens, J., Kindler, R., Gabrielle, B.,  
374 Schruppf, M. and Cellier, P.: Carbon, nitrogen and Greenhouse gases budgets over a four years crop rotation in northern  
375 France, *Plant Soil*, 343(1–2), 109–137, doi:10.1007/s11104-011-0751-9, 2011.

376 Macfarlane, C.: Great Western Woodlands OzFlux: Australian and New Zealand Flux Research and Monitoring hdl:  
377 102.100.100/14226, 2013.

378 McCaughey, J. H., Pejam, M. R., Arain, M. A., and Cameron, D. A.: Carbon dioxide and energy fluxes from a boreal mixedwood  
379 forest ecosystem in Ontario Canada, *Agr. Forest Meteorol.*, 140, 79–96, 2006.

380 Mu, Q.: Mod16a2\_monthly.Merra\_gmao\_1kmalb. (accessed on 1 October 2019),  
381 [http://files.ntsg.umd.edu/data/NTSG\\_Products/MOD16/MOD16A2\\_MONTHLY.MERRA\\_GMAO\\_1kmalb/](http://files.ntsg.umd.edu/data/NTSG_Products/MOD16/MOD16A2_MONTHLY.MERRA_GMAO_1kmalb/), 2015.

382 Noormets, A., Chen, J. and Crow, T. R.: Age-Dependent Changes in Ecosystem Carbon Fluxes in Managed Forests in Northern  
383 Wisconsin, USA, *Ecosystems*, 10(2), 187–203, doi:10.1007/s10021-007-9018-y, 2007.

384 ORNL DAAC: Home | fluxnetweb.ornl.gov, [online] Available from: <https://fluxnet.ornl.gov/> (Accessed 1 July 2019), 2015.

385 Pendall E.: Cumberland Plain OzFlux Tower Site OzFlux: Australian and New Zealand Flux Research and Monitoring hdl:  
386 102.100.100/25164, 2015.

387 Saleska, S.R., H.R. da Rocha, A.R. Huete, A.D. Nobre, P. Artaxo, and Y.E. Shimabukuro: . LBA-ECO CD-32 Flux Tower Network  
388 Data Compilation, Brazilian Amazon: 1999–2006. Data set. Available on-line [<http://daac.ornl.gov>] from Oak Ridge National  
389 Laboratory Distributed Active Archive Center, Oak Ridge, Tennessee, USA, doi:10.3334/ORNLDAAC/1174, 2013.

390 Reichstein, M., Rey, A., Freibauer, A., Tenhunen, J., Valentini, R., Banza, J., Casals, P., Cheng, Y., Grünzweig, J. M., Irvine, J.,  
391 Joffre, R., Law, B. E., Loustau, D., Miglietta, F., Oechel, W., Ourcival, J.-M., Pereira, J. S., Peressotti, A., Ponti, F., Qi, Y., Rambal,  
392 S., Rayment, M., Romanya, J., Rossi, F., Tedeschi, V., Tirone, G., Xu, M. and Yakir, D.: Modeling temporal and large-scale spatial  
393 variability of soil respiration from soil water availability, temperature and vegetation productivity indices, *Global Biogeochem.*  
394 *Cycles*, 17(4), doi:10.1029/2003GB002035, 2003.

395 Reichstein, M., Falge, E., Baldocchi, D., Papale, D., Aubinet, M., Berbigier, P., Bernhofer, C., Buchmann, N., Gilmanov, T., Granier,  
396 A., Grunwald, T., Havrankova, K., Ilvesniemi, H., Janous, D., Knohl, A., Laurila, T., Lohila, A., Loustau, D., Matteucci, G., Meyers,  
397 T., Miglietta, F., Ourcival, J.-M., Pumpanen, J., Rambal, S., Rotenberg, E., Sanz, M., Tenhunen, J., Seufert, G., Vaccari, F., Vesala,

398 T., Yakir, D. and Valentini, R.: On the separation of net ecosystem exchange into assimilation and ecosystem respiration: review  
399 and improved algorithm, *Glob. Chang. Biol.*, 11(9), 1424–1439, doi:10.1111/j.1365-2486.2005.001002.x, 2005.  
400 Revill, A., Sus, O., Barrett, B. and Williams, M.: Carbon cycling of European croplands: A framework for the assimilation of  
401 optical and microwave Earth observation data, *Remote Sens. Environ.*, 137, 84–93, doi:10.1016/j.rse.2013.06.002, 2013.  
402 Schroder, I.: Arcturus Emerald OzFlux tower site OzFlux: Australian and New Zealand Flux Research and Monitoring hdl:  
403 102.100.100/14249, 2014.  
404 Silberstein, R.: Gingga OzFlux, Australian and New Zealand Flux Research and Monitoring hdl: 102.100.100/22677, 2015.  
405 Soegaard, H. and Nordstroem, C.: Carbon dioxide exchange in a high-arctic fen estimated by eddy covariance measurements  
406 and modelling, *Glob. Chang. Biol.*, 5(5), 547–562, doi:10.1111/j.1365-2486.1999.00250.x, 1999.  
407 Stoy, P. C., Mauder, M., Foken, T., Marcolla, B., Boegh, E., Ibrom, A., Arain, M. A., Arneth, A., Aurela, M., Bernhofer, C., Cescatti,  
408 A., Dellwik, E., Duce, P., Gianelle, D., van Gorsel, E., Kiely, G., Knohl, A., Margolis, H., Mccaughey, H., Merbold, L., Montagnani,  
409 L., Papale, D., Reichstein, M., Saunders, M., Serrano-Ortiz, P., Sottocornola, M., Spano, D., Vaccari, F. and Varlagin, A.: A data-  
410 driven analysis of energy balance closure across FLUXNET research sites: The role of landscape scale heterogeneity, *Agric. For.*  
411 *Meteorol.*, 171–172, 137–152, doi:10.1016/j.agrformet.2012.11.004, 2013.  
412 Stefan A.: Wombat State Forest OzFlux-tower site OzFlux: Australian and New Zealand Flux Research and Monitoring hdl:  
413 102.100.100/14237, 2013.  
414 Sulkava, M., Luysaert, S., Zaehle, S. and Papale, D.: Assessing and improving the representativeness of monitoring networks:  
415 The European flux tower network example, *J. Geophys. Res.*, 116(G3), G00J04, doi:10.1029/2010JG001562, 2011.  
416 Wei, S., Yi, C., Hendrey, G., Eaton, T., Rustic, G., Wang, S., Liu, H., Krakauer, N. Y., Wang, W., Desai, A. R., Montagnani, L., Tha  
417 Paw U, K., Falk, M., Black, A., Bernhofer, C., Grünwald, T., Laurila, T., Cescatti, A., Moors, E., Bracho, R. and Valentini, R.: Data-  
418 based perfect-deficit approach to understanding climate extremes and forest carbon assimilation capacity, *Environ. Res. Lett.*,  
419 9, 065002, doi:10.1088/1748-9326/9/6/065002, 2014.  
420 Wood, E.: Princeton University SRB/GEWEX evapotranspiration (Penman-Monteith) L4 3 hour 0.5 degree x 0.5  
421 degree V1, Greenbelt, MD USA, Goddard Earth Sciences Data and Information Services Center (GES DISC),  
422 (accessed on 1 October 2019), 10.5067/MEASURES/WATERCYCLE/DATA314, 2017  
423 Woodgate, W.: Tumbumba OzFlux tower site OzFlux: Australian and New Zealand Flux Research and Monitoring hdl:  
424 102.100.100/14241, 2013.  
425 Zhang, Y., Pena A. J., McVicar, T. Chiew, F.; Vaze, J., Zheng, H., Wang, Y.: Monthly global observation-driven Penman-Monteith-  
426 Leuning (PML) evapotranspiration and components. v2. CSIRO. Data Collection. (accessed on 9 April 2019),  
427 <https://doi.org/10.4225/08/5719A5C48DB85>, 2016.  
428 Zhang, Ke: PLSH Monthly Global 8kmResolution: (accessed on 30 September 2019),  
429 [http://files.ntsg.umd.edu/data/ET\\_global\\_monthly/Global\\_8kmResolution/](http://files.ntsg.umd.edu/data/ET_global_monthly/Global_8kmResolution/), 2017.

430
